# Supplementary material for: Added value of assessing medical students’ reflective writings in communication skills training: a longitudinal study in four academic centres
Source: PubMed Central journal article supplement (PMC7651724; doi:10.1136/bmjopen-2020-038898), 2020-11-06
Supplement: bmjopen-2020-038898.draft_revisions.pdf [file bmjopen-2020-038898.draft_revisions.pdf]

# BMJ Open

BMJ Open is committed to open peer review. As part of this commitment we make the peer review history of every article we publish publicly available.

When an article is published we post the peer reviewers' comments and the authors' responses online. We also post the versions of the paper that were used during peer review. These are the versions that the peer review comments apply to.

The versions of the paper that follow are the versions that were submitted during the peer review process. They are not the versions of record or the final published versions. They should not be cited or distributed as the published version of this manuscript.

BMJ Open is an open access journal and the full, final, typeset and author-corrected version of record of the manuscript is available on our site with no access controls, subscription charges or pay-per-view fees (<http://bmjopen.bmj.com>).

If you have any questions on BMJ Open's open peer review process please email [info.bmjopen@bmj.com](mailto:info.bmjopen@bmj.com)

# BMJ Open

## The added value of assessing medical students' reflective writings in communication skills training: a longitudinal study in four academic centres.

|                               |                                                                                                                                                                                                                                                                                                                                                                                                                                                                                                                                                                                                                                                                                                                                                                                                                                                                                                                                |
|-------------------------------|--------------------------------------------------------------------------------------------------------------------------------------------------------------------------------------------------------------------------------------------------------------------------------------------------------------------------------------------------------------------------------------------------------------------------------------------------------------------------------------------------------------------------------------------------------------------------------------------------------------------------------------------------------------------------------------------------------------------------------------------------------------------------------------------------------------------------------------------------------------------------------------------------------------------------------|
| Journal:                      | <i>BMJ Open</i>                                                                                                                                                                                                                                                                                                                                                                                                                                                                                                                                                                                                                                                                                                                                                                                                                                                                                                                |
| Manuscript ID                 | bmjopen-2020-038898                                                                                                                                                                                                                                                                                                                                                                                                                                                                                                                                                                                                                                                                                                                                                                                                                                                                                                            |
| Article Type:                 | Original research                                                                                                                                                                                                                                                                                                                                                                                                                                                                                                                                                                                                                                                                                                                                                                                                                                                                                                              |
| Date Submitted by the Author: | 31-Mar-2020                                                                                                                                                                                                                                                                                                                                                                                                                                                                                                                                                                                                                                                                                                                                                                                                                                                                                                                    |
| Complete List of Authors:     | Ament Giuliani dos Santos Franco, Camila; Pontifical Catholic University of Parana, Medicine School<br>Franco, Renato; Pontifical Catholic University of Parana, Medicine School<br>Cecilio-Fernandes, Dario; State University of Campinas Faculty of Medical Sciences, ; University Of Groningen, University Medical Center Groningen<br>Severo, Milton; University of Porto Medical School, Department of Clinical Epidemiology, Predictive Medicine and Public Health and Public Health and Forensic Sciences, and Medical Education Department<br>Ferreira, Maria; University of Porto Faculty of Medicine, Public Health and Forensic Sciences, and Medical Education Department<br>de Carvalho-Filho, Marco Antonio; University Medical Center Groningen, CEDAR - Center for Educational Development and Research in Health Sciences; Universidade Estadual de Campinas Faculdade de Ciencias Medicas, Internal Medicine |
| Keywords:                     | MEDICAL EDUCATION & TRAINING, MEDICAL ETHICS, PRIMARY CARE                                                                                                                                                                                                                                                                                                                                                                                                                                                                                                                                                                                                                                                                                                                                                                                                                                                                     |
|                               |                                                                                                                                                                                                                                                                                                                                                                                                                                                                                                                                                                                                                                                                                                                                                                                                                                                                                                                                |

SCHOLARONE™  
Manuscripts

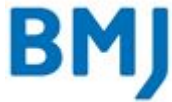

I, the Submitting Author has the right to grant and does grant on behalf of all authors of the Work (as defined in the below author licence), an exclusive licence and/or a non-exclusive licence for contributions from authors who are: i) UK Crown employees; ii) where BMJ has agreed a CC-BY licence shall apply, and/or iii) in accordance with the terms applicable for US Federal Government officers or employees acting as part of their official duties; on a worldwide, perpetual, irrevocable, royalty-free basis to BMJ Publishing Group Ltd ("BMJ") its licensees and where the relevant Journal is co-owned by BMJ to the co-owners of the Journal, to publish the Work in this journal and any other BMJ products and to exploit all rights, as set out in our [licence](#).

The Submitting Author accepts and understands that any supply made under these terms is made by BMJ to the Submitting Author unless you are acting as an employee on behalf of your employer or a postgraduate student of an affiliated institution which is paying any applicable article publishing charge ("APC") for Open Access articles. Where the Submitting Author wishes to make the Work available on an Open Access basis (and intends to pay the relevant APC), the terms of reuse of such Open Access shall be governed by a Creative Commons licence – details of these licences and which [Creative Commons](#) licence will apply to this Work are set out in our licence referred to above.

Other than as permitted in any relevant BMJ Author's Self Archiving Policies, I confirm this Work has not been accepted for publication elsewhere, is not being considered for publication elsewhere and does not duplicate material already published. I confirm all authors consent to publication of this Work and authorise the granting of this licence.

1  
2  
3 **The added value of assessing medical students' reflective writings in**  
4 **communication skills training: a longitudinal study in four academic**  
5 **centres.**  
6  
7  
8  
9

10  
11 **Assessing reflective writings in communication skills training**  
12  
13

14  
15 Camila Ament Giuliani Franco  
16

17 *Medicine School, Pontifical Catholic University of Paraná, Curitiba, Brazil.*  
18

19  
20 Address: Rua Imaculada Conceição, 1155 - Prado Velho, Curitiba – PR, 80215-901, Brasil -  
21 Escola de Medicina – PUCPR (Medicine School). Tel. +55 41 3271-1570. Email:  
22 [camilaament@gmail.com](mailto:camilaament@gmail.com); [camila.giuliani@pucpr.br](mailto:camila.giuliani@pucpr.br) ORCID: [https://orcid.org/0000-0003-](https://orcid.org/0000-0003-1176-480X)  
23 [1176-480X](https://orcid.org/0000-0003-1176-480X)  
24  
25  
26

27  
28 Family Physician, MD, PhD. Professor at the School of Medicine (discipline of Family  
29 Medicine), Pontifical University of Paraná, Curitiba, Brazil. Public Health and Forensic  
30 Sciences, and Medical Education Department, University of Porto, Portugal.  
31  
32

33  
34 The author declared no potential conflicts of interest with respect to the research, authorship,  
35 and/or publication of this article  
36  
37  
38  
39  
40  
41

42 Renato Soleiman Franco  
43

44 *Medicine School, Pontifical Catholic University of Paraná, Curitiba, Brazil.*  
45

46  
47 Address: Rua Imaculada Conceição, 1155 - Prado Velho, Curitiba – PR, 80215-901, Brasil -  
48 Escola de Medicina – PUCPR (Medicine School). Tel. +55 41 3271-1570. Email:  
49 [paum@uol.com.br](mailto:paum@uol.com.br); [renato.soleiman@pucpr.br](mailto:renato.soleiman@pucpr.br). ORCID: <https://orcid.org/0000-0003-1176-480X>  
50  
51  
52

53  
54 Psychiatrist, MD, PhD. Professor at the School of Medicine (discipline of Psychiatry),  
55 Pontifical University of Paraná, Curitiba, Brazil. Public Health and Forensic Sciences, and  
56 Medical Education Department, University of Porto, Portugal. Director of the Psychiatry  
57 Residency Program – FEAES/PMC, Curitiba.  
58  
59  
60

1  
2  
3 The author declared no potential conflicts of interest with respect to the research, authorship,  
4 and/or publication of this article  
5  
6  
7  
8  
9

## 10 Dario Cecilio-Fernandes

11  
12  
13 *Department of Medical Psychology and Psychiatry, School of Medical Sciences, University*  
14 *of Campinas (UNICAMP), Campinas, SP, Brazil.*  
15  
16

17  
18 Address: R. Tessália Vieira de Camargo, 126 - Cidade Universitária, Campinas - SP, 13083-  
19 887. dario.fernandes@gmail.com. ORCID: <https://orcid.org/0000-0002-8746-1680>  
20  
21

22 Psychologist. PhD - Researcher at School of Medical Sciences, University of Campinas  
23 (UNICAMP), Campinas, SP, Brazil and Researcher, AFAMEE.  
24  
25

26  
27 The author declared no potential conflicts of interest with respect to the research, authorship,  
28 and/or publication of this article  
29  
30  
31  
32  
33

## 34 Milton Severo

35  
36  
37 *Public Health and Forensic Sciences, and Medical Education Department. Faculty of*  
38 *Medicine, University of Porto, Portugal.*  
39  
40

41 Address: Milton Severo, Departamento de Ciências da Saúde Pública e Forenses e Educação  
42 Médica, Piso 6, Faculdade de Medicina da Universidade do Porto, Alameda Prof. Hernâni  
43 Monteiro, 4200-319 Porto – Portugal. E-mail: [severo.milton@gmail.com](mailto:severo.milton@gmail.com); [milton@med.up.pt](mailto:milton@med.up.pt)  
44  
45 ORCID: <https://orcid.org/0000-0002-5787-4871>.  
46  
47  
48

49 Graduated in Applied Mathematics and Computation, PhD in Public Health. Department of  
50 Epidemiology, Predictive Medicine and Public Health, Faculty of Medicine, University of  
51 Porto, Portugal. Public Health and Forensic Sciences, and Medical Education Department,  
52 University of Porto, Portugal. EPIUnit - Institute of Public Health, University of Porto,  
53  
54 Portugal.  
55  
56  
57  
58  
59  
60

1  
2  
3 The author declared no potential conflicts of interest with respect to the research, authorship,  
4 and/or publication of this article.  
5  
6  
7  
8  
9

10 Maria Amélia Ferreira

11  
12  
13 *Public Health and Forensic Sciences, and Medical Education Department. Faculty of*  
14 *Medicine, University of Porto, Portugal.*  
15  
16

17  
18 Address: Departamento de Ciências da Saúde Pública e Forenses e Educação Médica, Piso 6,  
19 Faculdade de Medicina da Universidade do Porto, Alameda Prof. Hernâni Monteiro, 4200-  
20 319 Porto – Portugal. Email: [mameliaferreira@gmail.com](mailto:mameliaferreira@gmail.com); [mameliaferreira@med.up.pt](mailto:mameliaferreira@med.up.pt). ORCID:  
21 <https://orcid.org/0000-0001-6789-3796>.  
22  
23  
24

25 Physician, PhD in Medical Education. Public Health and Forensic Sciences, and Medical  
26 Education Department, University of Porto, Portugal.  
27  
28

29  
30 The author declared no potential conflicts of interest with respect to the research, authorship,  
31 and/or publication of this article  
32  
33  
34  
35  
36  
37

38 Marco Antonio de Carvalho Filho (corresponding author)

39  
40 *University of Campinas, Campinas, SP, Brazil and Center for Education Development and Research*  
41 *in Health Professions - Research Group LEARN - Lifelong Learning, Education & Assessment*  
42 *Research, University of Groningen, Groningen, The Netherlands.*  
43  
44

45  
46 Address: Antonius Deusinglaan, 4, 9713 AW, Groningen, The Netherlands. E-mail:  
47 [m.a.de.carvalho.filho@umcg.nl](mailto:m.a.de.carvalho.filho@umcg.nl). <https://orcid.org/0000-0001-7008-4092>  
48  
49

50 Emergency Physician. PhD, Associate Professor, Internal Medicine Department, School of Medical  
51 Sciences, University of Campinas, Brazil; and Senior Researcher, Center of Education Development  
52 and Research in Health Professions, Research Group LEARN, University Medical Center Groningen,  
53 The Netherlands.  
54  
55  
56  
57  
58  
59  
60

## The added value of assessing medical students' reflective writings in communication skills training: a longitudinal study in four academic centres.

### Abstract

**Objectives:** This study describes the development and implementation of a model to assess students' communication skills highlighting the use of reflective writing. We aimed to evaluate the usefulness of the students' reflections in the assessment of communication skills.

**Design:** Third- and fourth-year medical students enrolled in an elective course on clinical communication skills development were assessed using different assessment methods.

**Setting and Participants:** The communication skills course was offered at four universities (three in Brazil and one in Portugal) and included 69 students.

**Outcome measures:** The students were assessed by a multiple-choice questionnaire (MCQ), an objective structured clinical examination (OSCE), and reflective writing narratives. The Cronbach's alpha, Dimensionality, and the Person's correlation were applied to evaluate the reliability of the assessment methods and their correlations. The depth of reflection was evaluated using the REFLECT Rubric (Reflect Score [RS]), and the themes of reflection were assessed by a Thematic Score (TS).

**Results:** The MCQ Cronbach's alpha was 0.697; for the six OSCE stations (OSCE global score), the Cronbach's alpha was 0.633. The RS had a Cronbach's alpha of 0.850 with an inter-examiner correlation of 0.816. In the TS, the Cronbach's alpha was 0.784, and the inter-examiner correlation was 0.907. The assessment of reflection using the TS was significantly correlated MCQ ( $r=0.412$ ;  $p=0.019$ ), OSCE ( $0.439$ ;  $p=0.012^*$ ), and RS ( $0.410$ ;  $p=0.020$ ). However, the depth of reflection (RS) only correlated with the TS.

**Conclusions:** The use of reflective writing expands the assessment of communication skills. Assessing reflection implies not only identifying the themes of the reflection but also its depth. Indeed, reflective depth seems to be a specific competence, not correlated with other assessment methods - possibly a metacognitive domain.

**Keywords:** medical education & training; medical ethics; primary care.

### Strengths and limitations of this study

- This study details the use of medical students' reflective narratives in the assessment of communication skills.
- The assessment of the depth (profundity) and the themes (topics) of medical students' reflective narratives has an additional value compared to the traditional assessment methods used in communication skills training.
- The method utilized to assess the depth and themes of medical students' reflective narratives showed good reliability.
- The participants were recruited from a convenience sample and further studies are needed to explore the added value of assessing medical students' reflective narratives in a natural context.

## 1. Introduction

Clinical communication is essential for medical students and must extend well beyond the reproduction of behaviours and skills [1]. Competent doctors must adapt their communication to the specific needs of their patients [2]. In this regard, for medical students to become competent communicators, they must reflect on their experiences with patients aiming for the self-monitoring of their thoughts and behaviours [1,3]. This reflective habitus may also help students to handle the particularities of each one of their clinical encounters, adapting their communication style to patients' needs and preferences [4]. Thus, reflection is an essential component of communication. However, most communication skills training does not include the assessment of students' reflections in their repertoire of assessment tools [5]. Understanding how assessing reflection supports (or not) the development of communication skills in medical students may offer medical educators a new strategy for improving doctor-patient communication.

The learning of communication skills requires that medical students adapt and adjust their patterns of behaviour to the needs and context of their patients [6]. Although the learning of some basic behavioural rules can indeed be an excellent starting point, such rules governing behaviour may not suffice for guiding students in the process of navigating the



1  
2  
3 complexity of doctor-patient communication. Each patient is unique and has his or her system  
4 of beliefs and singular expectations. Doctors must reflect in and on action to tailor their  
5 communication strategies to match each patient needs while respecting his or her personality  
6 and social and cultural background [7,8]. Therefore, we believe that the educational activities  
7 of the medical curricula targeting communication skills development should also include the  
8 teaching and assessment of reflection.  
9  
10  
11  
12  
13

14 Within an educational context, reflection is a process [9] whereby an individual  
15 critically analyses a previous experience and develops a deeper understanding of that  
16 experience. This 'reflection-on-action' plays a vital role in building mental models to be  
17 applied in clinical contexts. During the reflection, the subject must have self-awareness and  
18 engage in self-monitoring (metacognition) to guide his or her thoughts about a particular  
19 situation eliciting in them the disposal to reflect [3]. Although reflection has been considered  
20 keen in the development of clinical communication, its implementation has a low degree of  
21 systematisation, and little attention has been paid to the descriptions of the use of reflection as  
22 an assessment tool.  
23  
24  
25  
26  
27  
28  
29

30 Reflection can be assessed based on its content or depth. The content of reflection  
31 may be evaluated by theme or category-based analysis [10–12]. For example, Karnieli-Miller  
32 et al. (2018) used reflective writing to support the teaching of how to deliver bad news. In the  
33 reflective narratives, the authors identified through theme-based analysis all the elements that  
34 were part of the clinical protocol used as a reference during the study [11]. However, the  
35 study focused only on the content of reflection, but not on the depth of reflection. Moreover,  
36 the authors did not compare the results of the assessment of the reflection with those obtained  
37 through other methods of assessment. Similar to Karnieli-Miller et al. (2018), Braverman et  
38 al. (2016) used a coded framework for the thematic analysis of third-year medical students'  
39 reflective writing on challenges in communicating with patients but also did not assess the  
40 depth of reflection [12]. Thus, the studies that have sought to determine the role of reflection  
41 in teaching communication have targeted its themes, rather than its depth.  
42  
43  
44  
45  
46  
47  
48  
49  
50  
51

52 The Reflection Evaluation for Enhanced Competencies Tool (REFLECT rubric),  
53 proposed by Wald et al. (2012), highlights the importance of deep reflection in the  
54 development of metacognition and effective patient care [13] and has been widely used to  
55 evaluate reflection [14]. These authors organised a multidimensional analysis of reflection  
56 that assesses five mandatory items: description, presence, identification of a dilemma,  
57  
58  
59  
60

1  
2  
3 emotion, and the meaning of the experience [13]. These five items can be classified using a  
4 Likert scale ranging from 0 to 3, according to four different reflection levels (from non-  
5 reflective to critically reflective), which correspond to the depth of reflection. This  
6 assessment model distinguishes between written texts with superficial reflection (descriptive)  
7 and those with a high density of reflective elements. Although the REFLECT rubric was used  
8 successfully in assessment strategies for different learning activities in the medical education  
9 domain, the authors did not find any report of its use in communication skills training.

10  
11  
12  
13  
14  
15  
16 Communication training traditionally applies a combination of multiple choice  
17 questionnaires (MCQs) and Objective Structured Clinical Examination (OSCE) stations to  
18 assess students' cognitive knowledge and check students' performance [15,16]. Research  
19 shows a low correlation between the MCQ and OSCE scores, which suggests that, indeed,  
20 these methods are assessing different competencies [17–19]. Communication teachers can  
21 take advantage of these different scores and provide specific feedback targeting knowledge  
22 and/or behaviour. If cultivating reflection skills is also relevant to the process of becoming a  
23 good communicator, communication trainers should implement assessment strategies that  
24 target reflection skills to create an opportunity to provide feedback on this competency [20].  
25 Moreover, if reflection is a specific domain of competency, as we believe, the scores for  
26 reflection will have a low level of correlation with scores for traditional assessments such as  
27 MCQs and OSCEs. Therefore, understanding how the assessment of the content and depth of  
28 students' reflection add (or not) to conventional assessment methods can enlighten the  
29 importance of reflection in the process of honing communication skills to improve doctor-  
30 patient communication.

31  
32  
33  
34  
35  
36  
37  
38  
39  
40  
41  
42  
43 In this study, we report the development of a model for assessing the reflection  
44 process of medical students in the context of communication skills training. We also compare  
45 the assessment of reflection with other traditional methods (i.e. MCQ and OSCE) to  
46 understand the added value of assessing reflection. Our assumptions are: (1) reflection  
47 themes will correlate to MCQ scores, as both are related to knowledge, and (2) MCQ, OSCE,  
48 and reflection depth will not show correlations, as they measure different competencies  
49 (knowledge, skills, and reflective thinking, respectively).

## 50 51 52 53 54 55 56 57 58 **2. Methods** 59 60

## 2.1 Overview

This longitudinal observational study was carried out at three different Brazilian universities (one course at each university in 2015) and one university in Portugal (one course in 2016). Data collection occurred during these elective courses in clinical communication. Each course comprised five modules (25 hours in total) conducted over two months. The Calgary-Cambridge Guide to Communication [21,22] and Patient-Centred Medicine [23] were the conceptual and theoretical models behind the course. Those models were used as supportive frameworks, and students were not encouraged to follow them as behavioural protocols. The main focus of the course was on the need to reflect and adapt communication strategies to patients' needs and students' communication style. The modules of the course presented the content through reflective, small-group discussions, followed by simulation activities that used simulated patients and debriefing [24]. A detailed discussion of the course has been previously published [24].

## 2.2 Participants

A convenience sample of third- and fourth-year medical students at four universities were invited to participate in the study by email. For the sample recruitment, a class representative of the students in the third or fourth year sent an email to their colleagues inviting them to participate in the course. No financial incentives were given for their participation. A total of 69 participants (20 at University 1 - Brazil, 12 at University 2 - Brazil, 30 at University 3 - Brazil, and seven at University 4 - Portugal) agreed to participate. The participants joined a course containing five encounters with a total of 25 hours. The 69 participants were assessed at the end of the course with an MCQ and OSCE on communication skills. The participants were invited (but not obligated) to write a reflective piece, and 37 students produced texts.

## 2.3 Material: Assessment Instruments

We compared three different assessment methods: a cognitive test based on an MCQ, an examination of communication skills based on the OSCE, and an assessment of reflection

1  
2  
3 through reflective writing. The MCQ and OSCE were administered after the last meeting of  
4 the course. The reflective writing was optional and could be undertaken by the students at any  
5 point during the course. We decided that the reflective writing would be optional to  
6 understand the students' disposition to engage with this assessment method [25].  
7  
8  
9

10 The MCQ consisted of 63 items about clinical communication and the OSCE included  
11 six stations (specifically designed to assess communication skills); four of these had been  
12 tested in a pilot project [26]. This assessments were developed together with the Medical  
13 Education Department of the University of Porto to guarantee the quality of the items and  
14 stations. The MCQs and the checklist items were based on clinical situations or conceptual  
15 issues related to reference frameworks as the Calgary-Cambridge Guide to Communication  
16 [21,22], Patient-Centred Medicine [23] and the Kalamazoo Consensus [27].  
17  
18  
19  
20  
21  
22

23 There was one observer for each OSCE station who was responsible for filling out the  
24 assessment checklist. These checklists consisted of between six and 14 items per station.  
25 Each item on the checklist was then classified on a Likert scale ranging from 0 to 2 points.  
26 The final score of each station was obtained by the mean of its items. The OSCE global score  
27 was calculated as a mean considering the six stations.  
28  
29  
30  
31  
32

33 For the reflective writing component, students could choose any aspect of  
34 communication to explore, following the instruction: 'Suggestion for reflection: 1) Describe  
35 the situation; 2) Point out the dilemmas, doubts, and questions raised; 3) Point out feelings  
36 and observations; 4) Analyse the situation from different points of view; 5) Make a  
37 conclusion; and 6) Suggest a hypothesis. These steps are only a suggestion; you may conduct  
38 the reflection in whichever way that you prefer'. The reflective writing was evaluated in two  
39 different ways: (1) through the sum of the themes covered in each one of reflections – the  
40 thematic score (TS), and (2) through the REFLECT Rubric – the reflect score (RS) [13]. In  
41 the next paragraphs we describe how these two scores were calculated.  
42  
43  
44  
45  
46  
47  
48

49 For establishing the TS, two researchers (CF and RF) started a content analysis  
50 individually by reading carefully all the reflective writings made by the students. After  
51 reading, CF and RF selected the fragments related to clinical communication [28] and  
52 generated a single list with all the fragments from the reflections of all students. Next, CF and  
53 RF grouped the fragments in thematic categories independently. After, CF and RF met to  
54 reach a consensus on the main themes. After the definition of the main thematic categories,  
55 CF and RF read each one of the reflective writings for a second time and decided whether  
56  
57  
58  
59  
60

1  
2  
3 each of the themes were present or not. The two researchers assigned point scores  
4 accordingly to the presence of a certain theme ('0' for absent and '1' for present). The final  
5 TS corresponded to the sum of all the themes approached by the student. Finally, the  
6 agreement between the two researchers was evaluated, and, when there was a difference  
7 between the two, a final TS was reached by consensus.  
8  
9

10  
11  
12 The assessment based on the five mandatory dimensions of the REFLECT Rubric  
13 followed the guidelines set by the authors of the rubric. The five mandatory dimensions are:  
14 description, presence, identification of a dilemma, emotion, and the meaning of the  
15 experience. Each one of the dimensions are evaluated considering four levels of reflective  
16 capacity scored from 0-3 (habitual action or nonreflective = 0, thoughtful action or  
17 introspection = 1, reflection = 2 and critical reflection = 3). The sum of the scores obtained in  
18 each dimension was the total RS. (Table 1)  
19  
20  
21  
22  
23  
24

25 [Table 1 near here]  
26  
27  
28  
29

30 In summary, the TS refers to 'the subject of reflection – number of themes', the RS  
31 refers to 'how the reflection took place or the depth of reflection'.  
32  
33  
34  
35

## 36 2.4 Analysis 37 38 39

40 To assess the quality of the quantitative instruments, MCQ and OSCE, we performed  
41 an analysis of the main components and consistency based on Cronbach's alpha. A principal  
42 components analysis was used to assess dimensionality and content validity. Dimensionality  
43 was assessed using a scree plot, and the number of components was assessed according to the  
44 'elbow rule'. An element or item was considered to contribute to a principal component when  
45 it had a correlation value higher than 0.30. Internal consistency was evaluated using  
46 Cronbach's alpha (Cronbach 1951). Acceptable values for internal consistency were  
47 considered to be higher than 0.7. The linear associations between the assessment methods  
48 were assessed using the Pearson correlation considering missing complete at random to  
49 handle with missed correlations.  
50  
51  
52  
53  
54  
55  
56

57 To measure agreement between researchers, we used the intraclass single average  
58 value for absolute agreement. The inter-rater agreement rate was calculated for encoded  
59  
60

1  
2  
3 fragments (TS) and for the RS. NVivo software (version 11.3.2 for Mac) was used for  
4 qualitative data analysis, while the SPSS, Version 25.0, was used for quantitative data  
5 analysis.  
6  
7

8  
9 This research was approved by the Ethics Centre of the São João Hospital Centre of  
10 the Faculty of Medicine of the University of Porto (FMUP) and by the Research and Ethics  
11 Commission of the Pontifical Catholic University of Paraná (PUCPR). Participant consent  
12 was requested in the form of an informed consent before the participation in the  
13 communication skills course. Signed written consent forms were completed by all  
14 participants.  
15  
16  
17  
18  
19

## 20 21 22 **2.5 Patient and Public Involvement**

23  
24 There is no patient involved in the study  
25  
26  
27  
28

## 29 30 **3. Results**

31  
32 Sixty-nine students followed the courses and were included in the study. Fifty-five of  
33 the students were women (79.7%), and the mean age of participants was 23.5 years (SD  
34 2.495). Fourth-year students were the largest cohort (69.6%). All participants (69 students)  
35 underwent the MCQ and OSCE examinations, and 32 students also performed the reflective  
36 writing.  
37  
38  
39  
40  
41  
42

### 43 44 **3.1 Quality of the Instruments**

45  
46 The MCQ examination had a Cronbach's alpha of 0.697. For the six OSCE stations,  
47 the lower Cronbach's alpha level was 0.702, and the higher was 0.815. The Cronbach's alpha  
48 of the OSCE global score was 0.633.  
49  
50  
51

52 The TS had a Cronbach's alpha of 0.784, while the inter-examiner correlation for  
53 absolute single-measure concordance was 0.907 (two examiners). The RS had a Cronbach's  
54 alpha of 0.850 and an inter-examiner correlation for absolute single-measure concordance of  
55 0.816 (two examiners).  
56  
57  
58  
59  
60

### 3.2 Thematic Analysis

The thematic categories of the reflections were non-verbal communication (NV), the patient's perspective (PP), steps of communication (SC), doctor-patient relationships (DPR), ethics and respect (ER), empathy and altruism (EA) and humanistic values (HV) (Table 2).

[Table 2 near here]

### 3.3 Correlation between Instruments

Table 3 shows the correlations between the four different assessment methodologies. There was no correlation between the score for the depth of reflection (RS) and both the MCQ and OSCE scores. The RS was only correlated with the thematic score (TS). However, the TS score was positively correlated with the MCQ score (0.439;  $p=0.012$ ) and the OSCE score (0.412;  $p=0.019$ ).

[Table 3 near here]

## 4. Discussion

The assessment of the depth and themes of reflection provides a different perspective on the teaching and learning of communication skills. We found a positive correlation between the content of the students' reflections with their performance on a cognitive test and OSCE assessment, which suggested that the scope of the reflection was related to the students' knowledge. The lack of correlation between the depth of reflection and cognitive and behavioural tests suggests that reflection could be a particular competence domain.

#### 4.1 Importance of Including Assessment of Depth and Content When Evaluating Reflection

The reflection process ranges from elementary cognitive levels (description, identification, knowledge, and others) to higher levels of processing, such as analysis, evaluation, synthesis, and creation [29]. Using different methods to assess reflection offers an effective strategy to encourage students to engage in reflective activities and enhances the probability of students reaching deeper levels of reflection [30]. Thus, we agree with Hulsman et al. (2009) and advocate for the assessment of reflection in terms of its depth and content to improve communication skills training [31].

In the assessment of the reflection themes, teachers map the topics students address in their reflections. We observed that the number of themes addressed by students are linked to both knowledge [29] and practical performance [32–34]. We believe that a broader knowledge helps students to respond appropriately to different practical situations.

Interestingly, the reflection depth seems to be a different competence, not necessarily related to the knowledge level or current performance, but possibly related to the values and attitudes of the student regarding a specific topic [31]. Aligned with this hypothesis, Moniz et al. (2015) showed a lack of correlation between the depth of reflection (RS) and OSCE and MCQ scores of undergraduate medical students. However, in Moniz's study, the assessment methods were not targeting the same competence and the absence of standardization could explain the observed lack of correlation. In our study, we assessed a singular set of competencies (communication skills) and observed the same lack of correlation between reflection depth and other assessment methods.

Learning is a lifelong enterprise and achieving deeper reflection is crucial to the process of becoming an independent and self-regulated learner [35]. The achievement of deeper reflection requires (1) understanding the context; (2) elaborating on the experience; (3) searching for solutions to the problems posed; (4) acknowledging the different subjects involved; and (5) taking different perspectives [36]. Thus, when doctors achieve a deep sense of reflection on their practice they move from a state of being knowledge consumers to become active professionals capable of transforming their reality aiming for a practice based on their values and centred on the patient [37]. We believe that deeper reflection goes beyond applying the knowledge to a fixed situation; deeper reflection incorporates the elaboration of



1  
2  
3 new knowledge, balance of different perspectives, anticipation of challenges and planning of  
4 future behaviour[39].  
5  
6

7 Adding the depth of reflection to teaching and assessment models may allow teachers  
8 to capture students' standpoint, their meaning-making processes, and their values [40]. We  
9 hypothesize that the depth of reflection, particularly concerning communication skills, could  
10 be linked to the domain of 'being a doctor' and the formation of professional identity [41,42]  
11 by involving elements that extend beyond the context of daily practice to include belief  
12 systems and values, which are not commonly assessed in knowledge tests and OSCEs.  
13  
14  
15  
16  
17

## 18 **4.2 The Risks of Assessing Reflection**

19

20  
21 The assessment of reflection brings the risk of reducing the reflective practice to a tool  
22 or a mere parameter of a grading system. Under the pressure of scoring to pass exams,  
23 students often "play the game" and perform tasks and adopt behaviours to fit the expectations  
24 of teachers, without making a real transformative engagement in learning [43]. This risk  
25 should be avoided by linking the reflective process to the questioning of assumptions, power  
26 relations, and social and systemic structures. Ideally, the assessment of reflection should go in  
27 the opposite direction of conventional assessment methods [44]. The lack of correlation  
28 observed between depth of reflection and MCQ or OSCE scores aligns with this notion.  
29 Nevertheless, it is essential to continue studying the role of reflection among assessment  
30 methods to develop the potential of reflective practice without being reductive [45].  
31  
32  
33  
34  
35  
36  
37  
38  
39  
40  
41

## 42 **4.3 Limitations**

43

44  
45 The sample of this study was small and convenient. Thus, it is difficult to generalise  
46 our results to larger samples. As it was self-selected, the sample may represent more  
47 knowledgeable and motivated students, which may influence both the scores and percentage  
48 of students who engaged in the reflective writing (higher than 50%). The fact that the  
49 reflection was optional could have attracted students who were naturally reflective, which can  
50 also be a confounder. Our results must be confirmed by investigations using non-convenient  
51 samples and with a greater number of participants.  
52  
53  
54  
55  
56

57 The assessments were reliable and consistent but limited in terms of reproducibility  
58 owing to the number of assessments made. Our method of assessing reflection (reflective  
59  
60

1  
2  
3 writing) could be an element of bias since studies show different results when different  
4 reflection methods are used. For example, when reflecting in interviews, students may show  
5 levels of reflection that are different from those shown in reflective writing [46]. The current  
6 generation of students has a range of preferences when it comes to learning and methods of  
7 expression, and many do not have strong skills in written expression [47]. Thus, reflective  
8 depth can indeed be associated with students' writing skills [48]. In this way, some authors  
9 suggest diversification of reflective registers using alternatives such as digital storytelling.  
10 Thus, the use of writing to assume the depth of reflection has an important bias to be  
11 considered. Drawing definite conclusions about students' reflectiveness from only one source  
12 of reflective material may be biased.  
13  
14  
15  
16  
17  
18  
19  
20

#### 21 **4.5 Practical Implications**

22  
23  
24 Becoming a good communicator is one of the challenges posed to medical students.  
25 Communication training already embraces a body of cognitive knowledge that grounds  
26 learning activities. Communication training has also developed different strategies to nurture,  
27 check, and give feedback on the behaviours and attitudes of medical students during role-  
28 playing and simulated or real clinical encounters. However, becoming a good communicator  
29 is a life-long process, and, after leaving medical school, junior doctors have to take control of  
30 their learning process. Developing a reflective mindset that is capable of evaluating current  
31 behaviour – its roots, professional and personal consequences, and emotional impact – will  
32 allow junior doctors to transform their understandings and attitudes towards more patient-  
33 centred care. Reflection can facilitate this trajectory by supporting medical students during  
34 their first steps in becoming autonomous critical thinkers.  
35  
36  
37  
38  
39  
40  
41  
42  
43  
44  
45  
46  
47

#### 48 **Conclusion**

49 This study supports the use of reflective narratives as a complementary assessment  
50 method in the context of communication skills training. Assessing the depth of reflection  
51 offers a new perspective on students' development and allows the teacher to dive into  
52 students' understandings of the value of becoming a good communicator.  
53  
54  
55  
56  
57  
58  
59  
60

## **Acknowledgements**

We would also like to thank students for their willingness to participate in the course and achieve the assessment methods.

## **Declaration of interest**

The authors report no declarations of interest.

## **Author Statement**

Franco, CAGS and Franco, RS participated in the conception, design of the study, acquisition of data, analysis and interpretation of data, writing the final version of the manuscript.

Cecilio-Fernades, D made substantial contributions revising the paper critically for important improvement in whole manuscript. Carvalho-Filho MA made substantial contributions in the analysis, interpretation of data and in the writing of the final version of the manuscript.

Severo, M and Ferreira, MA made substantial contributions in the conception and design of the study, analysis and interpretation of data. All authors read and approved the final manuscript.

## **Declaration of Conflicting Interests**

The author(s) declared no potential conflicts of interest with respect to the research, authorship, and/or publication of this article.

## **Funding**

Financial support for the authors was provided by scholarships from the Conselho Nacional de Desenvolvimento Científico e Tecnológico (Brazilian National Council of Technological and Scientific Development - 229753/2013-2) and the Coordenação de Aperfeiçoamento de Pessoal de Nível Superior (Coordination for the Improvement of Higher Education Personnel, Brazil -13271/13-0).

**Data availability statement:** The datasets used during are available from the corresponding author on reasonable request.

**Word Count:** 3622 words

## References

- 1 Stewart M, Brown JB, Donner A, *et al.* The impact of patient-centered care on outcomes. *J Fam Pract* 2000;**49**:796–804.
- 2 Hoffmann TC, Bennett S, Tomsett C, *et al.* Brief training of student clinicians in shared decision making: a single-blind randomized controlled trial. *J Gen Intern Med* 2014;**29**:844–9. doi:10.1007/s11606-014-2765-5
- 3 Sandars J. The use of reflection in medical education: AMEE Guide No. 44. *Med Teach* 2009;**31**:685–95. doi:10.1080/01421590903050374
- 4 General Medical Council (GMC). Outcomes for graduates 2018. Gen Med Council. 2018;:26. doi:http://dx.doi.org/10.1016/j.healun.2004.01.011
- 5 Carney PA, Palmer RT, Fuqua Miller M, *et al.* Tools to Assess Behavioral and Social Science Competencies in Medical Education. *Acad Med* 2016;**91**:730–42. doi:10.1097/ACM.0000000000001090
- 6 Deveugele M. Communication training: Skills and beyond. *Patient Educ Couns* 2015;**98**:1287–91. doi:10.1016/j.pec.2015.08.011
- 7 Sommer J, Lanier C, Perron NJ, *et al.* A teaching skills assessment tool inspired by the Calgary-Cambridge model and the patient-centered approach. *Patient Educ Couns* 2016;**99**:600–9. doi:10.1016/j.pec.2015.11.024
- 8 Mamede S, Schmidt HG. The structure of reflective practice in medicine. *Med Educ* 2004;**38**:1302–8. doi:10.1111/j.1365-2929.2004.01917.x
- 9 Nguyen QD, Fernandez N, Karsenti T, *et al.* What is reflection? A conceptual analysis of major definitions and a proposal of a five-component model. *Med Educ* 2014;**48**:1176–89. doi:10.1111/medu.12583

- 1  
2  
3 10 Karnieli-Miller O, Palombo M, Meitar D. See, reflect, learn more: qualitative analysis  
4 of breaking bad news reflective narratives. *Med Educ* 2018;**52**:497–512.  
5  
6  
7 11 Karnieli-Miller O, Michael K, Eidelman S, *et al.* What you “see” is how you  
8 communicate: Medical students’ meaning making of a patient’s vignette. *Patient Educ*  
9 *Couns* 2018;**101**:1645–53. doi:10.1016/j.pec.2018.04.004  
10  
11  
12 12 Braverman G, Bereknyei Merrell S, Bruce JS, *et al.* Finding the Words: Medical  
13 Students’ Reflections on Communication Challenges in Clinic. *Fam Med*  
14 2016;**48**:775–83.  
15  
16  
17 13 Wald HS, Borkan JM, Taylor JS, *et al.* Fostering and Evaluating Reflective Capacity  
18 in Medical Education: Developing the REFLECT Rubric for Assessing Reflective  
19 Writing. *Acad Med* 2012;**87**:41–50. doi:10.1097/ACM.0b013e31823b55fa  
20  
21  
22 14 Uygur J, Stuart E, De Paor M, *et al.* A Best Evidence in Medical Education systematic  
23 review to determine the most effective teaching methods that develop reflection in  
24 medical students: BEME Guide No. 51. *Med Teach* 2019;**41**:3–16.  
25  
26  
27 doi:10.1080/0142159X.2018.1505037  
28  
29  
30 15 Nicolaides M, Cardillo L, Theodoulou I, *et al.* Developing a novel framework for non-  
31 technical skills learning strategies for undergraduates: A systematic review. *Ann Med*  
32 *Surg* 2018;**36**:29–40. doi:10.1016/j.amsu.2018.10.005  
33  
34  
35 16 Laidlaw A, Salisbury H, Doherty EM, *et al.* National survey of clinical communication  
36 assessment in medical education in the United Kingdom (UK). *BMC Med Educ*  
37 2014;**14**:10. doi:10.1186/1472-6920-14-10  
38  
39  
40 17 Martino S, Haeseler F, Belitsky R, *et al.* Teaching brief motivational interviewing to  
41 Year three medical students. *Med Educ* 2007;**41**:160–7. doi:10.1111/j.1365-  
42 2929.2006.02673.x  
43  
44  
45 18 Locklear W, Meires J, Quallich SA. Letters to the Editor. *Urol Nurs* 2018;**38**:307.  
46  
47  
48 doi:10.7257/1053-816x.2018.38.6.307  
49  
50  
51 19 Ayuob NN, Qadi MA, Eldeek BS, *et al.* Evaluation of a communication skills training  
52 course for medical students using peer role-play. *J Pak Med Assoc* 2017;**67**:745–51.  
53  
54  
55 20 Roze Des Ordon AL, Doig CJ, Couillard P, *et al.* From Communication Skills to  
56 Skillful Communication: A Longitudinal Integrated Curriculum for Critical Care  
57  
58  
59  
60

- 1  
2  
3 Medicine Fellows. *Acad Med* 2017;**92**:501–5. doi:10.1097/ACM.0000000000001420  
4  
5  
6 21 Simmenroth-Nayda A, Heinemann S, Nolte C, *et al.* Psychometric properties of the  
7 Calgary Cambridge guides to assess communication skills of undergraduate medical  
8 students. *Int J Med Educ* 2014;**5**:212–8. doi:10.5116/ijme.5454.c665  
9  
10  
11 22 Kurtz SM, Silverman JD. The Calgary-Cambridge Referenced Observation Guides: an  
12 aid to defining the curriculum and organizing the teaching in communication training  
13 programmes. *Med Educ* 1996;**30**:83–9. doi:10.1111/j.1365-2923.1996.tb00724.x  
14  
15  
16  
17 23 Stewart M, Brown JB, Weston WW, *et al.* *Patient-Centered Medicine: Transforming*  
18 *the Clinical Method*. Third Edit. London: : Radcliffe Publishing 2014.  
19  
20  
21 24 Franco C, Franco R, Severo M, *et al.* A Brief Course on Clinical Communication  
22 Skills: A Multi- Centered Study. *Acta Med Port* 2016;**29**:809–18.  
23 doi:10.20344/amp.8393  
24  
25  
26  
27 25 Meeus W, Van Petegem P, Engels N. Validity and reliability of portfolio assessment in  
28 pre-service teacher education. *Assess Eval High Educ* 2009;**34**:401–13.  
29 doi:10.1080/02602930802062659  
30  
31  
32  
33 26 Franco CAG dos S, Franco RS, Santos VM dos, *et al.* OSCE para Competências de  
34 Comunicação Clínica e Profissionalismo: Relato de Experiência e Meta-Avaliação.  
35 *Rev Bras Educ Med* 2015;**39**:433–41. doi:10.1590/1981-52712015v39n3e02832014  
36  
37  
38  
39 27 Makoul G. Essential elements of communication in medical encounters: the  
40 Kalamazoo consensus statement. *Acad Med* 2001;**76**:390–3.  
41  
42  
43 28 Haggarty L. What is content analysis? *Med Teach* 1996;**18**:99–101.  
44 doi:10.3109/01421599609034141  
45  
46  
47 29 Plack MM, Driscoll M, Marquez M, *et al.* Assessing Reflective Writing on a Pediatric  
48 Clerkship by Using a Modified Bloom’s Taxonomy. *Ambul Pediatr* 2007;**7**:285–91.  
49 doi:10.1016/j.ambp.2007.04.006  
50  
51  
52  
53 30 Barton G, Ryan M. Multimodal approaches to reflective teaching and assessment in  
54 higher education. *High Educ Res Dev* 2014;**33**:409–24.  
55 doi:10.1080/07294360.2013.841650  
56  
57  
58  
59 31 Hulsman RL. Shifting goals in medical communication. Determinants of goal  
60

- 1  
2  
3 detection and response formation. *Patient Educ Couns* 2009;**74**:302–8.  
4  
5 doi:10.1016/j.pec.2008.12.001  
6  
7 32 Miller GE. The assessment of clinical skills/competence/performance. *Acad Med*  
8 1990;**65**:S63-7.  
9  
10  
11 33 Pangaro L, ten Cate O. Frameworks for learner assessment in medicine: AMEE Guide  
12 No. 78. *Med Teach* 2013;**35**:e1197–210. doi:10.3109/0142159X.2013.788789  
13  
14  
15 34 Taylor DCMM, Hamdy H. Adult learning theories: implications for learning and  
16 teaching in medical education: AMEE Guide No. 83. *Med Teach* 2013;**35**:e1561-72.  
17  
18 doi:10.3109/0142159X.2013.828153  
19  
20  
21 35 Hayton A, Kang I, Wong R, *et al*. Teaching Medical Students to Reflect More Deeply.  
22 *Teach Learn Med* 2015;**27**:410–6. doi:10.1080/10401334.2015.1077124  
23  
24  
25 36 Wear D, Zarconi J, Garden R, *et al*. Reflection in/and Writing: Pedagogy and Practice  
26 in Medical Education. *Acad Med* 2012;**87**:603–9.  
27  
28 doi:10.1097/ACM.0b013e31824d22e9  
29  
30  
31 37 Manca A, Gormley GJ, Johnston JL, *et al*. Honoring Medicine’s Social Contract. *Acad*  
32 *Med* 2019;:1. doi:10.1097/ACM.0000000000003059  
33  
34  
35 38 Wald HS. Refining a definition of reflection for the being as well as doing the work of  
36 a physician. *Med Teach* 2015;**37**:696–9. doi:10.3109/0142159X.2015.1029897  
37  
38  
39 39 Mamede S, van Gog T, Moura AS, *et al*. Reflection as a strategy to foster medical  
40 students’ acquisition of diagnostic competence. *Med Educ* 2012;**46**:464–72.  
41  
42 doi:10.1111/j.1365-2923.2012.04217.x  
43  
44  
45 40 Finlay IG, Maughan TS, Webster DJ. Portfolio learning: a proposal for undergraduate  
46 cancer teaching. *Med Educ* 1994;**28**:79–82. doi:10.1111/j.1365-2923.1994.tb02690.x  
47  
48  
49 41 Cruess RL, Cruess SR, Steinert Y. Amending Miller’s Pyramid to Include Professional  
50 Identity Formation. *Acad Med* 2015;**91**:180–5. doi:10.1097/ACM.0000000000000913  
51  
52  
53 42 Al-Eraky M, Marei H. A fresh look at Miller’s pyramid: assessment at the ‘Is’ and  
54 ‘Do’ levels. *Med Educ* 2016;**50**:1253–7. doi:10.1111/medu.13101  
55  
56  
57 43 Lombarts MJMH. Competence-based education misses the essence of the medical  
58 profession. *Perspect Med Educ* 2015;**4**:326–8. doi:10.1007/s40037-015-0233-5  
59  
60

- 1  
2  
3 44 Charon R, Hermann N. Commentary: A Sense of Story, or Why Teach Reflective  
4 Writing? *Acad Med* 2012;**87**:5–7. doi:10.1097/ACM.0b013e31823a59c7  
5  
6  
7 45 de la Croix A, Veen M. The reflective zombie: Problematizing the conceptual  
8 framework of reflection in medical education. *Perspect Med Educ* 2018;**7**:394–400.  
9 doi:10.1007/s40037-018-0479-9  
10  
11  
12  
13 46 Baernstein A, Fryer-Edwards K. Promoting reflection on professionalism: a  
14 comparison trial of educational interventions for medical students. *Acad Med*  
15 2003;**78**:742–7.  
16  
17  
18  
19 47 Sandars J, Homer M. Reflective learning and the Net Generation. *Med Teach*  
20 2008;**30**:877–9. doi:10.1080/01421590802263490  
21  
22  
23 48 Tsingos-Lucas C, Bosnic-Anticevich S, Schneider CR, *et al.* Using Reflective Writing  
24 as a Predictor of Academic Success in Different Assessment Formats. *Am J Pharm*  
25 *Educ* 2017;**81**:8. doi:10.5688/ajpe8118  
26  
27  
28  
29  
30  
31  
32  
33  
34  
35  
36  
37  
38  
39  
40  
41  
42  
43  
44  
45  
46  
47  
48  
49  
50  
51  
52  
53  
54  
55  
56  
57  
58  
59  
60



Table 1. Description of the five dimensions in the RS.

| Dimensions                                          | Descriptions of the Dimensions                                                                                                                      |
|-----------------------------------------------------|-----------------------------------------------------------------------------------------------------------------------------------------------------|
| 1) Writing spectrum:                                | Assesses if reflection is just a superficial description of the event or a more detailed description with the exploitation of values and criticism. |
| 2) Presence:                                        | Assesses how much the student gets involved in or is detached from the narrative.                                                                   |
| 3) Description of conflict or disorienting dilemma: | Evaluates a wide range of situations, from the non-identification of a dilemma to a full description that includes different perspectives.          |
| 4) Attending to emotions:                           | Evaluates non-consideration of emotions, through the analysis of emotion.                                                                           |
| 5) Analysis and meaning making:                     | Evaluates the significance of the experience mentioned by the participant.                                                                          |
| 6) Attention to assignment-optional criterion:      | Evaluates whether the student responds to what is sought.                                                                                           |

Table 2. Example of fragments according to thematic categories.

| Thematic Categories          | Fragment Example                                                                                                                                           |
|------------------------------|------------------------------------------------------------------------------------------------------------------------------------------------------------|
| Non-Verbal                   | ‘I quickly noticed a strange, slightly frightened look on his face...’.                                                                                    |
| Steps of Consultation:       | ‘...the consultation I performed was... like a questionnaire application...’.                                                                              |
| Doctor-Patient Relationship: | ‘...it helps me, mainly to understand how to put the patient’s needs and well-being above my own...’.                                                      |
| Empathy and Respect:         | ‘I believe it is consensual that the attitude of the... ..is subject to criticism, after all, respect and patience with the patient are prerequisites...’. |
| Humanistic Values:           | ‘...the way he introduced himself... the attention with which he listened...’.                                                                             |

Table 3. Pearson correlations between the different methods of assessment.

| Assessment Methods | OSCE            | p-Value       | MCQ              | p-Value       | REFLECT Score   | p-Value       |
|--------------------|-----------------|---------------|------------------|---------------|-----------------|---------------|
| MCQ                | 0.396<br>(n=69) | <b>0.001*</b> | -                | -             | -               | -             |
| REFLECT Score      | 0.250<br>(n=32) | <b>0.168</b>  | -0.219<br>(n=32) | <b>0.228</b>  | -               | -             |
| Thematic Score     | 0.412<br>(n=32) | <b>0.019*</b> | 0.439<br>(n=32)  | <b>0.012*</b> | 0.410<br>(n=32) | <b>0.020*</b> |

MCQ; the p-value was considered a sign of statistical significance when it was lower than 0.05.

# Reporting checklist for cohort study.

Based on the STROBE cohort guidelines.

## Instructions to authors

Complete this checklist by entering the page numbers from your manuscript where readers will find each of the items listed below.

Your article may not currently address all the items on the checklist. Please modify your text to include the missing information. If you are certain that an item does not apply, please write "n/a" and provide a short explanation.

Upload your completed checklist as an extra file when you submit to a journal.

In your methods section, say that you used the STROBE cohort reporting guidelines, and cite them as:

von Elm E, Altman DG, Egger M, Pocock SJ, Gøtzsche PC, Vandenbroucke JP. The Strengthening the Reporting of Observational Studies in Epidemiology (STROBE) Statement: guidelines for reporting observational studies.

|                           | Reporting Item                                                                                                                                     | Page Number |
|---------------------------|----------------------------------------------------------------------------------------------------------------------------------------------------|-------------|
| <b>Title and abstract</b> |                                                                                                                                                    |             |
| Title                     | <a href="#">#1a</a> Indicate the study's design with a commonly used term in the title or the abstract                                             | 1           |
| Abstract                  | <a href="#">#1b</a> Provide in the abstract an informative and balanced summary of what was done and what was found                                | 4           |
| <b>Introduction</b>       |                                                                                                                                                    |             |
| Background / rationale    | <a href="#">#2</a> Explain the scientific background and rationale for the investigation being reported                                            | 5           |
| Objectives                | <a href="#">#3</a> State specific objectives, including any prespecified hypotheses                                                                | 7           |
| <b>Methods</b>            |                                                                                                                                                    |             |
| Study design              | <a href="#">#4</a> Present key elements of study design early in the paper                                                                         | 8           |
| Setting                   | <a href="#">#5</a> Describe the setting, locations, and relevant dates, including periods of recruitment, exposure, follow-up, and data collection | 8           |

|    |                      |                      |                                                                                                                                                                                                                                                                      |                                |
|----|----------------------|----------------------|----------------------------------------------------------------------------------------------------------------------------------------------------------------------------------------------------------------------------------------------------------------------|--------------------------------|
| 1  | Eligibility criteria | <a href="#">#6a</a>  | Give the eligibility criteria, and the sources and methods of selection of participants. Describe methods of follow-up.                                                                                                                                              | 8                              |
| 2  |                      |                      |                                                                                                                                                                                                                                                                      |                                |
| 3  |                      |                      |                                                                                                                                                                                                                                                                      |                                |
| 4  | Eligibility criteria | <a href="#">#6b</a>  | For matched studies, give matching criteria and number of exposed and unexposed                                                                                                                                                                                      | 8                              |
| 5  |                      |                      |                                                                                                                                                                                                                                                                      |                                |
| 6  |                      |                      |                                                                                                                                                                                                                                                                      |                                |
| 7  |                      |                      |                                                                                                                                                                                                                                                                      |                                |
| 8  | Variables            | <a href="#">#7</a>   | Clearly define all outcomes, exposures, predictors, potential confounders, and effect modifiers. Give diagnostic criteria, if applicable                                                                                                                             | 9                              |
| 9  |                      |                      |                                                                                                                                                                                                                                                                      |                                |
| 10 |                      |                      |                                                                                                                                                                                                                                                                      |                                |
| 11 |                      |                      |                                                                                                                                                                                                                                                                      |                                |
| 12 |                      |                      |                                                                                                                                                                                                                                                                      |                                |
| 13 |                      |                      |                                                                                                                                                                                                                                                                      |                                |
| 14 | Data sources /       | <a href="#">#8</a>   | For each variable of interest give sources of data and details of methods of assessment (measurement). Describe comparability of assessment methods if there is more than one group. Give information separately for for exposed and unexposed groups if applicable. | 10                             |
| 15 | measurement          |                      |                                                                                                                                                                                                                                                                      |                                |
| 16 |                      |                      |                                                                                                                                                                                                                                                                      |                                |
| 17 |                      |                      |                                                                                                                                                                                                                                                                      |                                |
| 18 |                      |                      |                                                                                                                                                                                                                                                                      |                                |
| 19 |                      |                      |                                                                                                                                                                                                                                                                      |                                |
| 20 |                      |                      |                                                                                                                                                                                                                                                                      |                                |
| 21 |                      |                      |                                                                                                                                                                                                                                                                      |                                |
| 22 | Bias                 | <a href="#">#9</a>   | Describe any efforts to address potential sources of bias                                                                                                                                                                                                            | 14                             |
| 23 |                      |                      |                                                                                                                                                                                                                                                                      |                                |
| 24 | Study size           | <a href="#">#10</a>  | Explain how the study size was arrived at                                                                                                                                                                                                                            | n/a -<br>convenience<br>sample |
| 25 |                      |                      |                                                                                                                                                                                                                                                                      |                                |
| 26 |                      |                      |                                                                                                                                                                                                                                                                      |                                |
| 27 |                      |                      |                                                                                                                                                                                                                                                                      |                                |
| 28 |                      |                      |                                                                                                                                                                                                                                                                      |                                |
| 29 |                      |                      |                                                                                                                                                                                                                                                                      |                                |
| 30 | Quantitative         | <a href="#">#11</a>  | Explain how quantitative variables were handled in the analyses. If applicable, describe which groupings were chosen, and why                                                                                                                                        | 8-10                           |
| 31 | variables            |                      |                                                                                                                                                                                                                                                                      |                                |
| 32 |                      |                      |                                                                                                                                                                                                                                                                      |                                |
| 33 |                      |                      |                                                                                                                                                                                                                                                                      |                                |
| 34 | Statistical          | <a href="#">#12a</a> | Describe all statistical methods, including those used to control for confounding                                                                                                                                                                                    | 8-10                           |
| 35 | methods              |                      |                                                                                                                                                                                                                                                                      |                                |
| 36 |                      |                      |                                                                                                                                                                                                                                                                      |                                |
| 37 | Statistical          | <a href="#">#12b</a> | Describe any methods used to examine subgroups and interactions                                                                                                                                                                                                      | 8-10                           |
| 38 | methods              |                      |                                                                                                                                                                                                                                                                      |                                |
| 39 |                      |                      |                                                                                                                                                                                                                                                                      |                                |
| 40 |                      |                      |                                                                                                                                                                                                                                                                      |                                |
| 41 | Statistical          | <a href="#">#12c</a> | Explain how missing data were addressed                                                                                                                                                                                                                              | 8-10                           |
| 42 | methods              |                      |                                                                                                                                                                                                                                                                      |                                |
| 43 |                      |                      |                                                                                                                                                                                                                                                                      |                                |
| 44 |                      |                      |                                                                                                                                                                                                                                                                      |                                |
| 45 | Statistical          | <a href="#">#12d</a> | If applicable, explain how loss to follow-up was addressed                                                                                                                                                                                                           | n/a                            |
| 46 | methods              |                      |                                                                                                                                                                                                                                                                      |                                |
| 47 |                      |                      |                                                                                                                                                                                                                                                                      |                                |
| 48 |                      |                      |                                                                                                                                                                                                                                                                      |                                |
| 49 | Statistical          | <a href="#">#12e</a> | Describe any sensitivity analyses                                                                                                                                                                                                                                    | 8-10                           |
| 50 | methods              |                      |                                                                                                                                                                                                                                                                      |                                |
| 51 |                      |                      |                                                                                                                                                                                                                                                                      |                                |
| 52 |                      |                      |                                                                                                                                                                                                                                                                      |                                |
| 53 | <b>Results</b>       |                      |                                                                                                                                                                                                                                                                      |                                |
| 54 |                      |                      |                                                                                                                                                                                                                                                                      |                                |
| 55 | Participants         | <a href="#">#13a</a> | Report numbers of individuals at each stage of study—eg numbers potentially eligible, examined for eligibility, confirmed eligible, included in the study, completing follow-up, and analysed. Give                                                                  | 11                             |
| 56 |                      |                      |                                                                                                                                                                                                                                                                      |                                |
| 57 |                      |                      |                                                                                                                                                                                                                                                                      |                                |
| 58 |                      |                      |                                                                                                                                                                                                                                                                      |                                |
| 59 |                      |                      |                                                                                                                                                                                                                                                                      |                                |
| 60 |                      |                      |                                                                                                                                                                                                                                                                      |                                |

information separately for for exposed and unexposed groups if applicable.

|    |                   |                                                                                                                                                                                                                                        |             |
|----|-------------------|----------------------------------------------------------------------------------------------------------------------------------------------------------------------------------------------------------------------------------------|-------------|
| 1  |                   |                                                                                                                                                                                                                                        |             |
| 2  |                   |                                                                                                                                                                                                                                        |             |
| 3  |                   |                                                                                                                                                                                                                                        |             |
| 4  | Participants      | <a href="#">#13b</a> Give reasons for non-participation at each stage                                                                                                                                                                  | 11          |
| 5  |                   |                                                                                                                                                                                                                                        |             |
| 6  | Participants      | <a href="#">#13c</a> Consider use of a flow diagram                                                                                                                                                                                    | n/a -       |
| 7  |                   |                                                                                                                                                                                                                                        | convenience |
| 8  |                   |                                                                                                                                                                                                                                        | sample      |
| 9  |                   |                                                                                                                                                                                                                                        |             |
| 10 |                   |                                                                                                                                                                                                                                        |             |
| 11 | Descriptive data  | <a href="#">#14a</a> Give characteristics of study participants (eg demographic, clinical, social) and information on exposures and potential confounders. Give information separately for exposed and unexposed groups if applicable. | 11          |
| 12 |                   |                                                                                                                                                                                                                                        |             |
| 13 |                   |                                                                                                                                                                                                                                        |             |
| 14 |                   |                                                                                                                                                                                                                                        |             |
| 15 |                   |                                                                                                                                                                                                                                        |             |
| 16 |                   |                                                                                                                                                                                                                                        |             |
| 17 |                   |                                                                                                                                                                                                                                        |             |
| 18 | Descriptive data  | <a href="#">#14b</a> Indicate number of participants with missing data for each variable of interest                                                                                                                                   | 11          |
| 19 |                   |                                                                                                                                                                                                                                        |             |
| 20 |                   |                                                                                                                                                                                                                                        |             |
| 21 |                   |                                                                                                                                                                                                                                        |             |
| 22 | Descriptive data  | <a href="#">#14c</a> Summarise follow-up time (eg, average and total amount)                                                                                                                                                           | 11          |
| 23 |                   |                                                                                                                                                                                                                                        |             |
| 24 | Outcome data      | <a href="#">#15</a> Report numbers of outcome events or summary measures over time. Give information separately for exposed and unexposed groups if applicable.                                                                        | 11-12       |
| 25 |                   |                                                                                                                                                                                                                                        |             |
| 26 |                   |                                                                                                                                                                                                                                        |             |
| 27 |                   |                                                                                                                                                                                                                                        |             |
| 28 |                   |                                                                                                                                                                                                                                        |             |
| 29 |                   |                                                                                                                                                                                                                                        |             |
| 30 | Main results      | <a href="#">#16a</a> Give unadjusted estimates and, if applicable, confounder-adjusted estimates and their precision (eg, 95% confidence interval). Make clear which confounders were adjusted for and why they were included          | 11-12       |
| 31 |                   |                                                                                                                                                                                                                                        |             |
| 32 |                   |                                                                                                                                                                                                                                        |             |
| 33 |                   |                                                                                                                                                                                                                                        |             |
| 34 |                   |                                                                                                                                                                                                                                        |             |
| 35 |                   |                                                                                                                                                                                                                                        |             |
| 36 | Main results      | <a href="#">#16b</a> Report category boundaries when continuous variables were categorized                                                                                                                                             | 11-12       |
| 37 |                   |                                                                                                                                                                                                                                        |             |
| 38 |                   |                                                                                                                                                                                                                                        |             |
| 39 |                   |                                                                                                                                                                                                                                        |             |
| 40 | Main results      | <a href="#">#16c</a> If relevant, consider translating estimates of relative risk into absolute risk for a meaningful time period                                                                                                      | 11-12       |
| 41 |                   |                                                                                                                                                                                                                                        |             |
| 42 |                   |                                                                                                                                                                                                                                        |             |
| 43 |                   |                                                                                                                                                                                                                                        |             |
| 44 | Other analyses    | <a href="#">#17</a> Report other analyses done—e.g., analyses of subgroups and interactions, and sensitivity analyses                                                                                                                  | 11-12       |
| 45 |                   |                                                                                                                                                                                                                                        |             |
| 46 |                   |                                                                                                                                                                                                                                        |             |
| 47 |                   |                                                                                                                                                                                                                                        |             |
| 48 | <b>Discussion</b> |                                                                                                                                                                                                                                        |             |
| 49 |                   |                                                                                                                                                                                                                                        |             |
| 50 | Key results       | <a href="#">#18</a> Summarise key results with reference to study objectives                                                                                                                                                           | 12          |
| 51 |                   |                                                                                                                                                                                                                                        |             |
| 52 |                   |                                                                                                                                                                                                                                        |             |
| 53 | Limitations       | <a href="#">#19</a> Discuss limitations of the study, taking into account sources of potential bias or imprecision. Discuss both direction and magnitude of any potential bias.                                                        | 14          |
| 54 |                   |                                                                                                                                                                                                                                        |             |
| 55 |                   |                                                                                                                                                                                                                                        |             |
| 56 |                   |                                                                                                                                                                                                                                        |             |
| 57 |                   |                                                                                                                                                                                                                                        |             |
| 58 | Interpretation    | <a href="#">#20</a> Give a cautious overall interpretation considering objectives,                                                                                                                                                     | 12-13       |
| 59 |                   |                                                                                                                                                                                                                                        |             |
| 60 |                   |                                                                                                                                                                                                                                        |             |

1 limitations, multiplicity of analyses, results from similar studies,  
2 and other relevant evidence.

3  
4 Generalisability [#21](#) Discuss the generalisability (external validity) of the study results 14  
5

6 **Other**  
7 **Information**  
8

9  
10 Funding [#22](#) Give the source of funding and the role of the funders for the 16  
11 present study and, if applicable, for the original study on which the  
12 present article is based  
13  
14

15 Notes:  
16

- 17  
18 • 10: n/a - convenience sample  
19  
20 • 13c: n/a - convenience sample The STROBE checklist is distributed under the terms of the Creative  
21 Commons Attribution License CC-BY. This checklist was completed on 27. March 2020 using  
22 <https://www.goodreports.org/>, a tool made by the [EQUATOR Network](#) in collaboration with [Penelope.ai](#)  
23  
24  
25  
26  
27  
28  
29  
30  
31  
32  
33  
34  
35  
36  
37  
38  
39  
40  
41  
42  
43  
44  
45  
46  
47  
48  
49  
50  
51  
52  
53  
54  
55  
56  
57  
58  
59  
60

# BMJ Open

## The added value of assessing medical students' reflective writings in communication skills training: a longitudinal study in four academic centres.

|                                 |                                                                                                                                                                                                                                                                                                                                                                                                                                                                                                                                                                                                                                                                                                                                                                                                                                                                                                       |
|---------------------------------|-------------------------------------------------------------------------------------------------------------------------------------------------------------------------------------------------------------------------------------------------------------------------------------------------------------------------------------------------------------------------------------------------------------------------------------------------------------------------------------------------------------------------------------------------------------------------------------------------------------------------------------------------------------------------------------------------------------------------------------------------------------------------------------------------------------------------------------------------------------------------------------------------------|
| Journal:                        | <i>BMJ Open</i>                                                                                                                                                                                                                                                                                                                                                                                                                                                                                                                                                                                                                                                                                                                                                                                                                                                                                       |
| Manuscript ID                   | bmjopen-2020-038898.R1                                                                                                                                                                                                                                                                                                                                                                                                                                                                                                                                                                                                                                                                                                                                                                                                                                                                                |
| Article Type:                   | Original research                                                                                                                                                                                                                                                                                                                                                                                                                                                                                                                                                                                                                                                                                                                                                                                                                                                                                     |
| Date Submitted by the Author:   | 13-Aug-2020                                                                                                                                                                                                                                                                                                                                                                                                                                                                                                                                                                                                                                                                                                                                                                                                                                                                                           |
| Complete List of Authors:       | Ament Giuliani dos Santos Franco, Camila; Pontifical Catholic University of Parana, Medicine School<br>Franco, Renato; Pontifical Catholic University of Parana, Medicine School<br>Cecilio-Fernandes, Dario; State University of Campinas Faculty of Medical Sciences, ; University Of Groningen, University Medical Center Groningen<br>Severo, Milton; University of Porto Medical School, Department of Clinical Epidemiology, Predictive Medicine and Public Health and Public Health and Forensic Sciences, and Medical Education Department<br>Ferreira, Maria; University of Porto Faculty of Medicine, Public Health and Forensic Sciences, and Medical Education Department<br>de Carvalho-Filho, Marco Antonio; University of Minho School of Medicine, Internal Medicine; University Medical Center Groningen, CEDAR - Center for Educational Development and Research in Health Sciences |
| <b>Primary Subject Heading</b>: | Medical education and training                                                                                                                                                                                                                                                                                                                                                                                                                                                                                                                                                                                                                                                                                                                                                                                                                                                                        |
| Secondary Subject Heading:      | Communication                                                                                                                                                                                                                                                                                                                                                                                                                                                                                                                                                                                                                                                                                                                                                                                                                                                                                         |
| Keywords:                       | MEDICAL EDUCATION & TRAINING, MEDICAL ETHICS, PRIMARY CARE                                                                                                                                                                                                                                                                                                                                                                                                                                                                                                                                                                                                                                                                                                                                                                                                                                            |
|                                 |                                                                                                                                                                                                                                                                                                                                                                                                                                                                                                                                                                                                                                                                                                                                                                                                                                                                                                       |

SCHOLARONE™  
Manuscripts





I, the Submitting Author has the right to grant and does grant on behalf of all authors of the Work (as defined in the below author licence), an exclusive licence and/or a non-exclusive licence for contributions from authors who are: i) UK Crown employees; ii) where BMJ has agreed a CC-BY licence shall apply, and/or iii) in accordance with the terms applicable for US Federal Government officers or employees acting as part of their official duties; on a worldwide, perpetual, irrevocable, royalty-free basis to BMJ Publishing Group Ltd ("BMJ") its licensees and where the relevant Journal is co-owned by BMJ to the co-owners of the Journal, to publish the Work in this journal and any other BMJ products and to exploit all rights, as set out in our [licence](#).

The Submitting Author accepts and understands that any supply made under these terms is made by BMJ to the Submitting Author unless you are acting as an employee on behalf of your employer or a postgraduate student of an affiliated institution which is paying any applicable article publishing charge ("APC") for Open Access articles. Where the Submitting Author wishes to make the Work available on an Open Access basis (and intends to pay the relevant APC), the terms of reuse of such Open Access shall be governed by a Creative Commons licence – details of these licences and which [Creative Commons](#) licence will apply to this Work are set out in our licence referred to above.

Other than as permitted in any relevant BMJ Author's Self Archiving Policies, I confirm this Work has not been accepted for publication elsewhere, is not being considered for publication elsewhere and does not duplicate material already published. I confirm all authors consent to publication of this Work and authorise the granting of this licence.

1  
2  
3 **The added value of assessing medical students' reflective writings in**  
4 **communication skills training: a longitudinal study in four academic**  
5 **centres.**  
6  
7  
8  
9

10  
11 **Assessing reflective writings in communication skills training**  
12  
13

14  
15 Camila Ament Giuliani Franco  
16

17 *Medicine School, Pontifical Catholic University of Paraná, Curitiba, Brazil.*  
18

19  
20 Address: Rua Imaculada Conceição, 1155 - Prado Velho, Curitiba – PR, 80215-901, Brasil -  
21 Escola de Medicina – PUCPR (Medicine School). Tel. +55 41 3271-1570. Email:  
22 [camilaament@gmail.com](mailto:camilaament@gmail.com); [camila.giuliani@pucpr.br](mailto:camila.giuliani@pucpr.br) ORCID: [https://orcid.org/0000-0003-](https://orcid.org/0000-0003-1176-480X)  
23 [1176-480X](https://orcid.org/0000-0003-1176-480X)  
24  
25  
26

27  
28 Family Physician, MD, PhD. Professor at the School of Medicine (discipline of Family  
29 Medicine), Pontifical University of Paraná, Curitiba, Brazil. Public Health and Forensic  
30 Sciences, and Medical Education Department, University of Porto, Portugal.  
31  
32

33  
34 The author declared no potential conflicts of interest with respect to the research, authorship,  
35 and/or publication of this article  
36  
37  
38  
39  
40  
41

42 Renato Soleiman Franco  
43

44 *Medicine School, Pontifical Catholic University of Paraná, Curitiba, Brazil.*  
45

46  
47 Address: Rua Imaculada Conceição, 1155 - Prado Velho, Curitiba – PR, 80215-901, Brasil -  
48 Escola de Medicina – PUCPR (Medicine School). Tel. +55 41 3271-1570. Email:  
49 [paum@uol.com.br](mailto:paum@uol.com.br); [renato.soleiman@pucpr.br](mailto:renato.soleiman@pucpr.br). ORCID: <https://orcid.org/0000-0003-1176-480X>  
50  
51  
52

53  
54 Psychiatrist, MD, PhD. Professor at the School of Medicine (discipline of Psychiatry), and at  
55 Post-Graduate Program in Bioethics - Pontifical University of Paraná, Curitiba, Brazil. Public  
56 Health and Forensic Sciences, and Medical Education Department, University of Porto,  
57 Portugal. Director of the Psychiatry Residency Program – FEAES/PMC, Curitiba.  
58  
59  
60

1  
2  
3 The author declared no potential conflicts of interest with respect to the research, authorship,  
4 and/or publication of this article  
5  
6  
7  
8  
9

## 10 Dario Cecilio-Fernandes

11  
12  
13 *Department of Medical Psychology and Psychiatry, School of Medical Sciences, University*  
14 *of Campinas (UNICAMP), Campinas, SP, Brazil.*  
15  
16

17  
18 Address: R. Tessália Vieira de Camargo, 126 - Cidade Universitária, Campinas - SP, 13083-  
19 887. dario.fernandes@gmail.com. ORCID: <https://orcid.org/0000-0002-8746-1680>  
20  
21

22 Psychologist. PhD - Researcher at School of Medical Sciences, University of Campinas  
23 (UNICAMP), Campinas, SP, Brazil and Researcher, AFAMEE.  
24  
25

26  
27 The author declared no potential conflicts of interest with respect to the research, authorship,  
28 and/or publication of this article  
29  
30  
31  
32  
33

## 34 Milton Severo

35  
36  
37 *Public Health and Forensic Sciences, and Medical Education Department. Faculty of*  
38 *Medicine, University of Porto, Portugal.*  
39  
40

41 Address: Milton Severo, Departamento de Ciências da Saúde Pública e Forenses e Educação  
42 Médica, Piso 6, Faculdade de Medicina da Universidade do Porto, Alameda Prof. Hernâni  
43 Monteiro, 4200-319 Porto – Portugal. E-mail: [severo.milton@gmail.com](mailto:severo.milton@gmail.com); [milton@med.up.pt](mailto:milton@med.up.pt)  
44  
45 ORCID: <https://orcid.org/0000-0002-5787-4871>.  
46  
47  
48

49 Graduated in Applied Mathematics and Computation, PhD in Public Health. Department of  
50 Epidemiology, Predictive Medicine and Public Health, Faculty of Medicine, University of  
51 Porto, Portugal. Public Health and Forensic Sciences, and Medical Education Department,  
52 University of Porto, Portugal. EPIUnit - Institute of Public Health, University of Porto,  
53  
54  
55  
56 Portugal.  
57  
58  
59  
60

1  
2  
3 The author declared no potential conflicts of interest with respect to the research, authorship,  
4 and/or publication of this article.  
5  
6  
7  
8  
9

10 **Maria Amélia Ferreira**

11  
12  
13 *Public Health and Forensic Sciences, and Medical Education Department. Faculty of*  
14 *Medicine, University of Porto, Portugal.*  
15  
16

17  
18 Address: Departamento de Ciências da Saúde Pública e Forenses e Educação Médica, Piso 6,  
19 Faculdade de Medicina da Universidade do Porto, Alameda Prof. Hernâni Monteiro, 4200-  
20 319 Porto – Portugal. Email: [mameliaferreira@gmail.com](mailto:mameliaferreira@gmail.com); [mameliaferreira@med.up.pt](mailto:mameliaferreira@med.up.pt). ORCID:  
21 <https://orcid.org/0000-0001-6789-3796>.  
22  
23  
24

25  
26 Physician, PhD in Medical Education. Public Health and Forensic Sciences, and Medical  
27 Education Department, University of Porto, Portugal.  
28  
29

30 The author declared no potential conflicts of interest with respect to the research, authorship,  
31 and/or publication of this article  
32  
33  
34  
35  
36  
37

38 **Marco Antonio de Carvalho Filho (corresponding author)**

39  
40 *University of Minho, Braga, Portugal and Center for Education Development and Research in Health*  
41 *Professions - Research Group LEARN - Lifelong Learning, Education & Assessment Research,*  
42 *University of Groningen, Groningen, The Netherlands.*  
43  
44

45  
46 Address: Antonius Deusinglaan, 4, 9713 AW, Groningen, The Netherlands. E-mail:  
47 [m.a.de.carvalho.filho@umcg.nl](mailto:m.a.de.carvalho.filho@umcg.nl). <https://orcid.org/0000-0001-7008-4092>  
48  
49

50  
51 Emergency Physician. PhD, Associate Professor, Internal Medicine Department, Medical School,  
52 University of Minho, Portugal; and Senior Researcher, Center of Education Development and  
53 Research in Health Professions, Research Group LEARN, University Medical Center Groningen, The  
54 Netherlands.  
55  
56  
57  
58  
59  
60

# The added value of assessing medical students' reflective writings in communication skills training: a longitudinal study in four academic centres.

## Abstract

**Objectives:** This study describes the development and implementation of a model to assess students' communication skills highlighting the use of reflective writing. We aimed to evaluate the usefulness of the students' reflections in the assessment of communication skills.

**Design:** Third- and fourth-year medical students enrolled in an elective course on clinical communication skills development were assessed using different assessment methods.

**Setting and Participants:** The communication skills course was offered at four universities (three in Brazil and one in Portugal) and included 69 students.

**Outcome measures:** The students were assessed by a multiple-choice questionnaire (MCQ), an objective structured clinical examination (OSCE), and reflective writing narratives. The Cronbach's alpha, Dimensionality, and the Person's correlation were applied to evaluate the reliability of the assessment methods and their correlations. Reflective writing was assessed by applying the REFLECT Rubric (Reflect Score [RS]) to measure reflections' depth, and the Thematic Score (TS) to map and grade reflections' themes.

**Results:** The Cronbach alpha for the MCQ, OSCE global score, TS, and RS were respectively 0.697, 0.633, 0.784 and 0.850. The inter-observer correlation for the TS and RS were respectively 0.907 and 0.816. The assessment of reflection using the TS was significantly correlated with the MCQ ( $r=0.412$ ;  $p=0.019$ ), OSCE ( $0.439$ ;  $p=0.012^*$ ), and RS ( $0.410$ ;  $p=0.020$ ). The RS did not correlate with the MCQ and OSCE.

**Conclusions:** Assessing reflection through mapping the themes and analysing the depth of reflective writing expands the assessment of communication skills. While the assessment of reflective themes is related to the cognitive and behavioural domains of learning, the reflective depth seems to be a specific competence, not correlated with other assessment methods - possibly a metacognitive domain.

**Keywords:** medical education & training; medical ethics; primary care.

## Strengths and limitations of this study

- This study details the use of medical students' reflective narratives in the assessment of communication skills.
- The assessment of the depth (profundity) and the themes (topics) of medical students' reflective narratives has an additional value compared to the traditional assessment methods used in communication skills training.
- The method utilized to assess the depth and themes of medical students' reflective narratives showed good reliability.
- The participants were recruited from a convenience sample and further studies are needed to explore the added value of assessing medical students' reflective narratives in a natural context.

## 1. Introduction

Clinical communication is essential for medical students and must extend well beyond the reproduction of behaviours and skills [1]. Competent doctors must adapt their communication to the specific needs of their patients [2]. In this regard, for medical students to become competent communicators, they must reflect on their experiences with patients aiming for the self-monitoring of their thoughts and behaviours to improve their performance in further interactions with patients [1,3]. Although reflection is an essential component of developing communication [4], most communication skills training does not include the assessment of students' reflections in their repertoire of assessment tools [5]. Understanding how assessing reflection may support (or not) the development of communication skills in medical students may offer medical educators a new strategy for improving doctor-patient communication.

Medical students must be aware of patients' needs and willing to adapt their patterns of behaviour according these needs and context [6]. Although the learning of some basic behavioural rules can indeed be an excellent starting point, such rules governing behaviour may not suffice for guiding students in the process of navigating the complexity of doctor-

1  
2  
3 patient communication. Each patient is unique and has his or her system of beliefs and  
4 singular expectations. Doctors must tailor their communication strategies to match each  
5 patient needs while respecting his or her personality and social and cultural background [7,8].  
6  
7 Doctors should adapt their communication styles to each patient by addressing the  
8 complexity of human interactions, which includes attending with and regulating their own  
9 emotions, understanding the context, and identifying potential dilemmas. In mastering  
10 communication, doctors should reflect before, during and after each clinical encounter to  
11 recognise their limitations and identify areas for improvement while planning how to achieve  
12 better outcomes [4]. Therefore, we advocate that educational activities that target the  
13 development of medical students' communication skills should include the teaching and  
14 assessment of reflection.  
15  
16  
17  
18  
19  
20  
21  
22

23 Within an educational context, reflection is a process [9] whereby individuals  
24 critically analyse their cognitive and behavioural responses to a certain experience and  
25 develop a deeper understanding of the experience and themselves. The reflection may start  
26 even before the experience starts (*reflection-for-action*), so that students can achieve a  
27 broader understanding of a particular task, which helps them to prepare for action. For  
28 example, when students anticipate that the task exceeds their level of competence, they may  
29 ask for help [10]. The reflection can also occur during the experience (*reflection-in-action*).  
30 This reflection in action refers to the capacity to address just-in-time information by applying  
31 the process of analysis and critics during an event, which may lead to real-time adaptation of  
32 the performance. After the end of the experience, students can engage in a *reflection-on-*  
33 *action* process by reviewing and analysing the event and its course to reach a deeper  
34 understanding and elaborate new knowledge [8]. Fostering reflection on-action has been one  
35 of the starting points for the development of reflective practices in medical education, from  
36 first-year undergraduate classes to post-graduate training [3,11]. For instance, in the context  
37 of doctor-patient relationship, the process of reflection on-action has a vital role in building  
38 mental models that become available to be applied in future clinical experiences to enhance  
39 emotional awareness, emotion expression, and empathy [4,12–14].  
40  
41  
42  
43  
44  
45  
46  
47  
48  
49  
50  
51  
52

53 Most of the methods for assessing reflection targets reflection on-action processes,  
54 mainly by the use of students' reflective writing [3,11]. Reflective writing supports students'  
55 self-monitoring, generates self-awareness [15] and promotes a deeper understanding of  
56 patients by allowing the inclusion of biopsychosocial perspectives in next consultations  
57 [16,17]. Although reflection on-action has been considered keen in the development of  
58  
59  
60

1  
2  
3 clinical communication [4,18], its implementation has a low degree of systematisation and  
4 minimal attention has been paid to descriptions of the use of reflective writing as an  
5 assessment tool in this context [4].  
6  
7

8  
9 Reflective writing can be assessed based on the content or depth of reflection. The  
10 content of reflection may be evaluated by theme or category-based analysis [19–21]. For  
11 example, Karnieli-Miller et al. (2018) used reflective writing to support the teaching of how  
12 to deliver bad news. In the reflective narratives, the authors identified through theme-based  
13 analysis all the elements that were part of the clinical protocol used as a reference during the  
14 study [20]. However, the study focused on the content of reflection, but not on the depth of  
15 reflection. Moreover, the authors did not compare the results of the assessment of the  
16 reflection with those obtained through other methods of assessment. Similar to Karnieli-  
17 Miller et al. (2018), Braverman et al. (2016) used a coded framework for the thematic  
18 analysis of third-year medical students' reflective writing on challenges in communicating  
19 with patients but also did not assess the depth of reflection [21]. Thus, the studies that have  
20 sought to determine the role of reflection in teaching communication have targeted its  
21 themes, rather than its depth.  
22  
23

24  
25 The Reflection Evaluation for Enhanced Competencies Tool (REFLECT rubric),  
26 proposed by Wald et al. (2012), highlights the importance of deep reflection in the  
27 development of metacognition and effective patient care [22] and has been widely used to  
28 evaluate reflection, particularly reflection on-action processes [23]. These authors organised a  
29 multidimensional analysis of reflection that assesses five mandatory items: writing spectrum,  
30 presence, description of conflict, attending to emotions, and meaning-making [22]. These five  
31 items can be classified using a Likert scale ranging from 0 to 3, according to four different  
32 reflection levels (from non-reflective to critically reflective), which correspond to the depth  
33 of reflection. This assessment model distinguishes between written texts with only superficial  
34 reflection (descriptive) and those with a high density of reflective elements. Although the  
35 REFLECT rubric was used successfully in assessment strategies for different learning  
36 activities involving reflective writing in medical education, its use in communication skills  
37 training must be stimulated and better analysed [4,11].  
38  
39

40  
41 Communication training traditionally applies a combination of multiple choice  
42 questionnaires (MCQs) and Objective Structured Clinical Examination (OSCE) stations to  
43 assess students' cognitive knowledge and check students' performance [24,25]. Previous  
44  
45  
46  
47  
48  
49  
50  
51  
52  
53  
54



1  
2  
3 research shows a low correlation between the MCQ and OSCE scores, which suggests that,  
4 indeed, these methods are assessing different competencies [26–28]. Communication teachers  
5 should take advantage of these different scores and provide specific feedback targeting  
6 knowledge and/or behaviour. Since cultivating reflection skills is also relevant to the process  
7 of becoming a competent communicator, communication trainers should implement  
8 assessment strategies that target reflection skills to create an opportunity to provide feedback  
9 on this competency [29].

10  
11  
12  
13  
14  
15  
16  
17  
18  
19  
20  
21  
22  
23  
24  
25  
26  
27  
28  
29  
30  
31  
32  
33  
34  
35  
36  
37  
38  
39  
40  
41  
42  
43  
44  
45  
46  
47  
48  
49  
50  
51  
52  
53  
54  
55  
56  
57  
58  
59  
60  
There is a lack of research exploring the impact of reflection on the learning of communication skills. The use of the reflective capacity in the teaching and assessment of communication skills, namely, in scenarios related to practice, must be encouraged once it can foster students' professionalism, critical thinking and attitudes [3,4,12–14,23]. Reflective capacity, as a metacognitive process, surpasses (but includes) cognitive and behavioural elements. Understanding the level of correlation between the scores for reflection and the scores for traditional assessments, such as MCQs and OSCEs, potentially contribute to the discussion regarding the role of assessing reflection in communication skills training. Therefore, we raise the following research questions: Is the assessment of reflective writing correlated with cognitive (MCQ) and behavioural (OSCE) assessment methods?

To address these questions, we report the development of a model for assessing the reflection on-action of medical students in the context of communication skills training by applying two methods to evaluate students' reflective writing (themes and depth). We also compare the assessment of reflective writing with other traditional methods (i.e., MCQ and OSCE) to understand the added value of assessing the reflection process using these two methods. Understanding the added value of assessing students' reflective writing may contribute to clarify the importance of reflection in the process of honing communication skills to improve doctor-patient communication and support its future application in learning activities.

## 2. Methods

### 2.1 Overview

This longitudinal observational study was carried out at three different Brazilian universities (one course at each university in 2015) and one university in Portugal (one course in 2016). Data collection occurred during these elective courses in clinical communication. Each course comprised five modules (25 hours in total) conducted over two months. The elective discipline did not disturb students' academic trajectory and occurred in parallel to the regular learning activities. It is worth mentioning that, although this course did not involve practice with patients, all of the students had clinical encounters with patients in hospitals and primary care settings during their regular academic activities.

The Calgary-Cambridge Guide to Communication [30,31] and Patient-Centred Medicine [32] were the conceptual and theoretical models behind this elective communication skills' course. The contents of the first four modules comprised the steps of consultation: 1) initiating the session, 2) gathering information, 3) explanation and planning, 4) closing the session; and last one included the 5) breaking bad news. These contents and models were employed as supportive frameworks, and students were not encouraged to follow them as behavioural protocols. The main focus of the course was on the need to reflect and adapt communication strategies to patients' needs and students' communication style. Each module of the course was structured following 4 steps: 1) presentation of the content via reflective, small-group discussions, 2) simulation activities with simulated patients; 3) Reflective debriefing and 4) Summary of the learning points and preparation for next-modules [33]. The course did not have a module about theoretical assumptions of reflection or reflective writing, but the instructor of the course structured the discussion of the content (step 1) and debriefing (step 3) using the Gibbs Reflective Circle [33].

The cases selected for simulation involved clinical scenarios about common health problems with contextual or emotional challenges. For example, in one scenario, an apparently healthy woman asked for a preconception consultation regarding planning for pregnancy. The woman had a history of sexual abuse (between the ages of eleven and thirteen) by her uncle. She was neglected by her family even after informing her parents about the abuse. This scenario is very emotional and, unfortunately, represents a common occurrence in primary care settings where the students have their clinical training. The learning objective of this scenario is to consider the patient as a whole (one of the main

1  
2  
3 principles of patient-centeredness), obtain biopsychosocial information and address emotions  
4 (discuss empathy and affective reactions). In preparation to engage with the scenarios,  
5 students are stimulated to reflect in action and develop self-awareness and active listening  
6 skills, both competencies are among the pillars of one of the theoretical references of the  
7 course. During the debriefing of this and other cases, the facilitator stimulated a profound,  
8 horizontal, and collaborative discussion about the different elements and emotions involved  
9 in dealing with the simulated encounter. The facilitator actively invited students to take  
10 different perspectives. Every session ended with the elaboration of an action plan aiming to  
11 improve student's future performance and provide better patient care. A detailed discussion  
12 of the course has been previously published [34].  
13  
14  
15  
16  
17  
18  
19  
20  
21  
22

## 23 **2.2 Participants**

24  
25  
26 A convenience sample of third- and fourth-year medical students at four universities  
27 were invited to participate in the study by email. For the sample recruitment, a class  
28 representative of the students in the third or fourth year sent an email to their colleagues  
29 inviting them to participate in the course. No financial incentives were given for their  
30 participation. A total of 69 participants (20 at University 1 - Brazil, 12 at University 2 -  
31 Brazil, 30 at University 3 - Brazil, and seven at University 4 - Portugal) agreed to participate.  
32 The participants joined a course containing five encounters with a total of 25 hours. The 69  
33 participants were assessed at the end of the course with an MCQ and OSCE on  
34 communication skills. The participants were invited (but not obligated) to write a reflective  
35 piece, and 37 students produced texts.  
36  
37  
38  
39  
40  
41  
42  
43  
44  
45  
46

## 47 **2.3 Material: Assessment Instruments**

48  
49  
50 We compared three different assessment methods: a cognitive test based on an MCQ,  
51 an examination of communication skills based on the OSCE, and an assessment of reflection  
52 through reflective writing. The MCQ and OSCE were administered after the last meeting of  
53 the course on communication skills. The reflective writing was optional and could be  
54 undertaken by the students at any point during the communication skills' course. We decided  
55  
56  
57  
58  
59  
60

1  
2  
3 that the reflective writing would be optional to understand the students' disposition to engage  
4 with this assessment method [35].  
5  
6

7 The MCQ consisted of 63 items about clinical communication. The items were based  
8 on clinical situations or conceptual issues that were grounded in the Calgary-Cambridge  
9 Guide to Communication [30,31], Patient-Centred Medicine [32], and Kalamazoo Consensus  
10 [36].  
11  
12  
13

14 The OSCE included six stations specifically designed to assess communication skills.  
15 The OSCE was based on the same references of the MCQ (Calgary-Cambridge Guide to  
16 Communication [30,31], Patient-Centred Medicine [32] and Kalamazoo Consensus [36]).  
17 Four of these stations had been tested by the authors in a pilot project [37]). To elaborate the  
18 six stations, two medical educators with expertise in OSCE and clinical communication  
19 collaborated to develop the stations and checklists. The OSCE targets behavioural domains  
20 (communication skills) and affective domains (empathy and compassion) both in the context  
21 of doctor-patient interactions. According to the blueprint based on the content of the course,  
22 the stations assessed students in scenarios in which they must break bad news to a patient's  
23 family, break bad news to a patient, gather information to reach a clinical diagnosis, engage  
24 in shared decision-making, address moral conflicts, and care for a patient with multiple  
25 complaints. There was one observer for each OSCE station who was responsible for filling  
26 out the assessment checklist. These checklists consisted of between six and 14 items  
27 depending on the station. Each item on the checklist was then classified on a Likert scale  
28 ranging from 0 to 2 points. The final score of each station was obtained by the mean of its  
29 items. The OSCE global score was calculated as a mean considering the six stations.  
30  
31  
32  
33  
34  
35  
36  
37  
38  
39  
40  
41  
42

43 For the reflective writing component, students could choose any aspect of doctor-  
44 patient communication that they considered challenging in their clinical practice. The only  
45 advice was that students should find a calm place to write – a place that enables them to focus  
46 their attention on their writing with as few distractions as possible. Medical students did not  
47 take a course on reflection and reflective writing before this study. The students received the  
48 following instruction: 'Suggestion for reflection: 1) Describe the situation; 2) Point out the  
49 dilemmas, doubts, and questions raised; 3) Point out feelings and observations; 4) Analyse  
50 the situation from different points of view; 5) Make a conclusion; and 6) Suggest a  
51 hypothesis. These steps are only a suggestion; you may conduct the reflection in whichever  
52 way that you prefer'.  
53  
54  
55  
56  
57  
58  
59  
60

1  
2  
3 The writing content was related to communication skills and evaluated (1) through  
4 the sum of the themes covered in each one of reflections – the thematic score (TS), and (2)  
5 through the REFLECT Rubric – the reflect score (RS) [22]. In the next paragraphs we  
6 describe how these two scores were calculated.  
7  
8  
9

10 For establishing the TS, two researchers (CF and RF) started a content analysis  
11 individually by reading carefully all the reflective writings made by the students. After  
12 reading, CF and RF selected the fragments related to clinical communication [38] and  
13 generated a single list with all the fragments from the reflections of all students. Next, CF and  
14 RF grouped the fragments in thematic categories independently. After, CF and RF met to  
15 reach a consensus on the main themes. After the definition of the main thematic categories,  
16 CF and RF read each one of the reflective writings for a second time and decided whether  
17 each of the themes were present or not. The two researchers assigned point scores  
18 accordingly to the presence of a certain theme ('0' for absent and '1' for present). The final  
19 TS corresponded to the sum of all the themes approached by the student. Finally, the  
20 agreement between the two researchers was evaluated, and, when there was a difference  
21 between the two, a final TS was reached by consensus.  
22  
23  
24  
25  
26  
27  
28  
29  
30  
31

32 The assessment based on the five mandatory dimensions of the REFLECT Rubric  
33 followed the guidelines set by the authors of the rubric. The five mandatory dimensions are:  
34 description, presence, identification of a dilemma, emotion, and the meaning of the  
35 experience. Each one of the dimensions are evaluated considering four levels of reflective  
36 capacity scored from 0-3 (habitual action or nonreflective = 0, thoughtful action or  
37 introspection = 1, reflection = 2 and critical reflection = 3). The sum of the scores obtained in  
38 each dimension was the total RS. Appendix 1 presented a fragment of one reflective writing  
39 and the application of the assessment to the five dimensions of the REFLECT rubric  
40 (Appendix 1).  
41  
42  
43  
44  
45  
46  
47

48 In summary, the TS refers to 'the subject of reflection – number of themes', the RS  
49 refers to 'how the reflection took place or the depth of reflection'.  
50  
51  
52  
53  
54  
55  
56  
57  
58  
59  
60

## 2.4 Analysis

The quality of the MCQ was assessed by internal consistency, items' responsiveness, face, content, and construct validity. The face and content validity of MCQ were developed with the support of the group in the Medical Education Department of the University of Porto, which was responsible for the evaluation of high-stakes exams of the Faculty of Medicine to guarantee the quality of the items. Three experts in communication (one of them is an external member of the University) assessed and approved the assessment regarding its content. The internal consistency of the items was evaluated by Cronbach's alpha. The responsiveness and construct validity were evaluated according to a published study, in which this MCQ test was applied [34]. The items' responsiveness was considered adequate once the score before and after a course on communication improved significantly. The mean of improvement was 18.9% (confidence interval of 95%, ranges from 15.8 to 22.1%) ( $p < 0.001$ ). The MCQ (pre and post-test) was applied to medical students who attained the same communication course at 4 universities. The improvement in the scores after the course did not show differences among universities ( $p = 0.102$ ). Thus, the results indicate an acceptable construct validity.

The psychometric quality of the OSCE was evaluated by validation of the content (applying the principal component analysis for dimensionality) and internal consistency. Dimensionality was assessed using a scree plot, and the number of components was assessed according to the 'elbow rule'. An element or item was considered to contribute to a principal component when it had a correlation value higher than 0.30. Internal consistency was evaluated using Cronbach's alpha (Cronbach 1951). Acceptable values for internal consistency were considered to be higher than 0.7. The linear associations between the assessment methods were assessed using the Pearson's correlation considering missing complete at random to handle with missed correlations. It was also provided a 95% confidence interval for the Pearson's correlation to present the precision of the correlation.

To measure agreement between researchers, we used the intraclass single average value for absolute agreement. The inter-rater agreement rate was calculated for encoded fragments (TS) and for the RS. NVivo software (version 11.3.2 for Mac) was used for qualitative data analysis, while the SPSS, Version 25.0, was used for quantitative data analysis.

1  
2  
3 This research was approved by the Ethics Centre of the São João Hospital Centre of  
4 the Faculty of Medicine of the University of Porto (FMUP) and by the Research and Ethics  
5 Commission of the Pontifical Catholic University of Paraná (PUCPR). Participant consent  
6 was requested in the form of an informed consent before the participation in the  
7 communication skills course. Signed written consent forms were completed by all  
8 participants.  
9  
10  
11  
12  
13  
14  
15  
16

## 17 **2.5 Patient and Public Involvement**

18 There is no patient involved in the study  
19  
20  
21  
22

## 23 **3. Results**

24  
25 Sixty-nine students followed the courses and were included in the study. Fifty-five of  
26 the students were women (79.7%), and the mean age of participants was 23.5 years (SD  
27 2.495). Fourth-year students were the largest cohort (69.6%). All participants (69 students)  
28 underwent the MCQ and OSCE examinations, and 32 students also performed the reflective  
29 writing.  
30  
31  
32  
33  
34  
35  
36

### 37 **3.1 Quality of the Instruments**

38  
39  
40  
41 The MCQ examination had a Cronbach's alpha of 0.697. For the six OSCE stations,  
42 the lower Cronbach's alpha level was 0.702, and the higher was 0.815. The Cronbach's alpha  
43 of the OSCE global score was 0.633. Considering one component (OSCE global score), the  
44 factor loads of the OSCEs stations were higher than 0.3 (Table X).  
45  
46  
47

48 The TS had a Cronbach's alpha of 0.784, while the inter-examiner correlation for  
49 absolute single-measure concordance was 0.907 (two examiners). The RS had a Cronbach's  
50 alpha of 0.850 and an inter-examiner correlation for absolute single-measure concordance of  
51 0.816 (two examiners).  
52  
53  
54  
55  
56  
57  
58  
59  
60

### 3.2 Thematic Analysis

The thematic categories of the reflections were non-verbal communication (NV), the patient's perspective (PP), steps of communication (SC), doctor-patient relationships (DPR), ethics and respect (ER), empathy and altruism (EA) and humanistic values (HV) (Table 1).

[Table 1 near here]

### 3.3 Correlation between Instruments

Table 2 shows the correlations between the four different assessment methodologies. There was no correlation between the score for the depth of reflection (RS) and both the MCQ and OSCE scores. The RS was only correlated with the thematic score (TS). However, the TS score was positively correlated with the MCQ score (0.439;  $p=0.012$ ) and the OSCE score (0.412;  $p=0.019$ ).

[Table 2 near here]

## 4. Discussion

The assessment of the depth and themes of reflection on-action provides a different perspective on the teaching and learning of communication skills. We found a positive correlation between the content of the students' reflections with their performance on a cognitive test and OSCE assessment, which suggested that the scope of the reflection was related to the students' knowledge. The lack of correlation between the depth of reflection and cognitive and behavioural tests suggests that reflection could be a particular competence domain.

### 4.1 Importance of Including Assessment of Depth and Content When Evaluating Reflection



1  
2  
3 The reflection process ranges from elementary cognitive levels (description,  
4 identification, knowledge, and others) to higher levels of processing, such as analysis,  
5 evaluation, synthesis, and creation [38]. Using different methods to assess reflection offers an  
6 effective strategy to encourage students to engage in reflective activities and enhances the  
7 probability of students reaching deeper levels of reflection [39]. Thus, we agree with  
8 Hulsman et al. (2009) and advocate for the assessment of reflection in terms of its depth and  
9 content (themes) to improve communication skills training [40].  
10  
11  
12  
13  
14  
15

16 In the assessment of the reflection themes, teachers map the topics students address in  
17 their reflections. We observed that the number of themes addressed by students are linked to  
18 both knowledge [38] and practical performance [41–43]. Our results suggest that a broader  
19 knowledge base and a bigger repertoire of adequate behaviours help students to respond  
20 appropriately to different practical situations. The analysis of reflections that are based on its  
21 themes can be applied to assist the evaluation of these learning elements.  
22  
23  
24  
25  
26

27 Interestingly, the reflection depth seems to be a different competence, not necessarily  
28 related to the knowledge level or current performance, but possibly related to the values and  
29 attitudes of the student regarding a specific topic [40]. It is possible that assessing the depth  
30 of reflective writings, even in a particular context (communication skills in our case), enables  
31 the evaluation of a specific domain of competence (reflective competence or reflective  
32 capacity). Aligned with this hypothesis, Moniz et al. (2015) showed a lack of correlation  
33 between the depth of reflection (RS) and OSCE and MCQ scores of undergraduate medical  
34 students. However, in Moniz's study, the assessment methods were not targeting the same  
35 competence and the absence of standardization could explain the observed lack of  
36 correlation. In our study, we assessed a singular set of competencies (communication skills)  
37 and observed the same lack of correlation between reflection depth and other assessment  
38 methods. Thus, even after narrowing the context, the lack of association persists.  
39  
40  
41  
42  
43  
44  
45  
46  
47

48 Learning is a lifelong enterprise and achieving deeper reflection is crucial to the  
49 process of becoming an independent and self-regulated learner [44]. The achievement of  
50 deeper reflection requires (1) understanding the context; (2) elaborating on the experience;  
51 (3) searching for solutions to the problems posed; (4) acknowledging the different subjects  
52 involved; and (5) taking different perspectives [45]. Thus, when doctors achieve a deep sense  
53 of reflection on their practice they move from a state of being knowledge consumers to  
54 become active professionals capable of transforming their reality aiming for a practice based  
55  
56  
57  
58  
59  
60

1  
2  
3 on their values and centred on the patient [46]. We believe that deeper reflection goes beyond  
4 applying the knowledge to a fixed situation; deeper reflection incorporates the elaboration of  
5 new knowledge, balance of different perspectives, anticipation of challenges and planning of  
6 future behaviour [47].  
7  
8  
9

10 Adding the depth of reflection to teaching and assessment models may allow teachers  
11 to capture students' standpoint, their meaning-making processes, and their values [48]. We  
12 hypothesize that the depth of reflection, particularly concerning communication skills, could  
13 be linked to the domain of 'being a doctor' and the formation of professional identity [49,50]  
14 by involving elements that extend beyond the context of daily practice to include belief  
15 systems and values, which are not commonly assessed in knowledge tests and OSCEs.  
16  
17  
18  
19  
20  
21

## 22 **4.2 The Risks of Assessing Reflection**

23  
24  
25 The assessment of reflection introduces the risk of limiting the reflective practice For  
26 instance, in our study, the observed lack of correlation with cognitive and behavioural  
27 assessments may derive from the failing of reflective writing to comprise all of the  
28 complexity related to the doctor-patient communication. In practical settings, when caring for  
29 a patient, students' reflective practice involves gathering information; being empathetic and  
30 compassionate; becoming aware of the clinical, emotional, and social context; and identifying  
31 conflicts—all crucial elements of addressing patients' needs to guarantee a patient-centred  
32 attitude. As a result, reflection is a complex process that involves emotional, cognitive, and  
33 moral dimensions. Considering this complexity, we must ponder to what extent the writing  
34 reflections are capable of capturing all the elements of students' reflective processes. In  
35 addition, our grading system may have driven students to focus on some aspects of the  
36 communication process while disregarding other aspects. Grading reflections can pressure  
37 students in scoring. The prevalent culture based on targeting high scores may motivate  
38 students to "play the game" and perform tasks and adopt behaviours to fit the expectations of  
39 teachers without engaging in transformative learning [51]. Thus, the lack of a correlation  
40 between the reflective capacity and knowledge and behaviour and the limits of assessing  
41 reflection must be considered. This lack of correlation cannot be extrapolated to the reflective  
42 capacity, which is an important limitation of our study. Nevertheless, it is essential to  
43 continue investigating the role of reflection as an assessment method for exploring the  
44 potential of reflective practice in medical education [52].  
45  
46  
47  
48  
49  
50  
51  
52  
53  
54  
55  
56  
57  
58  
59  
60

1  
2  
3 The risk of adopting a reductionistic approach to reflective practices may be avoided  
4 by driving the reflective process beyond the achievement of satisfactory grades and  
5 performance towards the questioning of taken-for-granted assumptions. These questionings  
6 must include the examination of power relations and social and systemic structures. Thus, the  
7 reflective capacity should not only address students' knowledge but also foster students'  
8 ability to critically analyse what is assumed to be right or wrong [46,53–56].  
9

### 14 **4.3 Limitations**

17 This study is one of the first studies to apply multiple methods of assessment,  
18 including the evaluation of reflection on-action; however, its limits must be considered. The  
19 sample of this study was small and convenient. Our small sample may have influenced both  
20 the qualitative analysis and quantitative analysis. It is possible that larger samples could  
21 increase the number of categories and subcategories in the thematic analysis. Moreover, the  
22 lower number of assessments using the REFLECT rubric (32) restricts the generalisation of  
23 the results. The small sample limits the application of more refined statistical methods, for  
24 example, adjusting the results for sample characteristics. As it was self-selected, the sample  
25 may represent more knowledgeable and motivated students, which may influence both the  
26 scores and percentage of students who engaged in the reflective writing (higher than 50%).  
27 The fact that the reflection was optional could have attracted students who were naturally  
28 reflective, which can also be a confounder. Our results must be confirmed by investigations  
29 using non-convenient samples and with a greater number of participants.  
30  
31  
32  
33  
34  
35  
36  
37  
38  
39

40 The clinical practice involves a complex setting where elements beyond reflective  
41 capacity can drive decisions and behaviour, for example, emotional regulation and  
42 interpersonal skills. Thus, reflection during an event (reflection in-action) would arguably be  
43 more correlated with students' cognitive and behavioural developments. Note that the lack of  
44 correlation among the assessment methods relates to reflection on-action and does not relate  
45 to reflection in general. To broaden the applicability of reflection as an assessment method,  
46 future studies also need to focus on assessing reflection in-action processes.  
47  
48  
49  
50  
51

52 The assessments were reliable and consistent but limited in terms of reproducibility  
53 owing to the number of assessments made. Our method of assessing reflection (reflective  
54 writing) could be an element of bias since studies show different results when different  
55 reflection methods are used. For example, when reflecting in interviews, students may show  
56 levels of reflection that are different from those shown in reflective writing [57]. The current  
57  
58  
59  
60

1  
2  
3 generation of students has a range of preferences when it comes to learning and methods of  
4 expression, and many do not have strong skills in written expression [58]. Thus, reflective  
5 depth can indeed be associated with students' writing skills [59]. In this way, some authors  
6 suggest diversification of reflective registers using alternatives such as digital storytelling.  
7 Thus, the use of writing to assume the depth of reflection has an important bias to be  
8 considered. Drawing definite conclusions about students' reflectiveness from only one source  
9 of reflective material may be biased.

10  
11  
12  
13  
14  
15  
16  
17  
18  
19  
20  
21  
22  
23  
24  
25  
26  
27  
28  
29  
30  
31  
32  
33  
34  
35  
36  
37  
38  
39  
40  
41  
42  
43  
44  
45  
46  
47  
48  
49  
50  
51  
52  
53  
54  
55  
56  
57  
58  
59  
60

Few studies apply multiple methods to assess communication skills, mainly studies that evaluate reflection. Although the results of this research highlight the assessment of reflections and promote discussions on its use for communication skills training, our assumptions and the limitations of this research may be considered.

#### 4.5 Practical Implications

Becoming a good communicator is one of the challenges posed to medical students. Communication training already embraces a body of cognitive knowledge that grounds learning activities. Communication training has also developed different strategies to nurture, check, and give feedback on the behaviours and attitudes of medical students during role-playing and simulated or real clinical encounters. However, becoming a good communicator is a life-long process, and, after leaving medical school, junior doctors have to take control of their learning process. Developing a reflective mindset that is capable of evaluating current behaviour – its roots, professional and personal consequences, and emotional impact – will allow junior doctors to transform their understandings and attitudes towards more patient-centred care. Reflection can facilitate this trajectory by supporting medical students during their first steps in becoming autonomous critical thinkers.

#### Conclusion

This study supports the use of reflective narratives as a complementary assessment method in the context of communication skills training. Assessing the depth of reflection offers a new perspective on students' development and allows the teacher to dive into students' understandings of the value of becoming a good communicator.

## Acknowledgements

We would also like to thank students for their willingness to participate in the course and achieve the assessment methods.

## Author Statement

Franco, CAGS and Franco, RS participated in the conception, design of the study, acquisition of data, analysis and interpretation of data, writing the final version of the manuscript. Cecilio-Fernades, D made substantial contributions in the interpretation of data and revising the paper critically for important improvement in whole manuscript. Carvalho-Filho MA made substantial contributions in the analysis, interpretation of data and in the writing of the final version of the manuscript. Severo, M and Ferreira, MA made substantial contributions in the conception and design of the study, analysis and interpretation of data. All authors read and approved the final manuscript.

## Declaration of Conflicting Interests

The author(s) declared no potential conflicts of interest with respect to the research, authorship, and/or publication of this article.

## Funding

Financial support for the authors was provided by scholarships from the Conselho Nacional de Desenvolvimento Científico e Tecnológico (Brazilian National Council of Technological and Scientific Development - 229753/2013-2) and the Coordenação de Aperfeiçoamento de Pessoal de Nível Superior (Coordination for the Improvement of Higher Education Personnel, Brazil -13271/13-0).

**Data availability statement:** The datasets used during are available from the corresponding author on reasonable request.

**Word Count:** 3622 words

## References

- 1 Stewart M, Brown JB, Donner A, *et al.* The impact of patient-centered care on outcomes. *J Fam Pract* 2000;**49**:796–804.<http://www.ncbi.nlm.nih.gov/pubmed/11032203>
- 2 Hoffmann TC, Bennett S, Tomsett C, *et al.* Brief training of student clinicians in shared decision making: a single-blind randomized controlled trial. *J Gen Intern Med* 2014;**29**:844–9. doi:10.1007/s11606-014-2765-5
- 3 Sandars J. The use of reflection in medical education: AMEE Guide No. 44. *Med Teach* 2009;**31**:685–95. doi:10.1080/01421590903050374
- 4 Karnieli-Miller O, Michael K, Gothelf AB, *et al.* The Associations between Reflective Ability and Communication Skills among Medical Students. *Patient Educ Couns* Published Online First: 2020. doi:10.1016/j.pec.2020.06.028
- 5 Carney PA, Palmer RT, Fuqua Miller M, *et al.* Tools to Assess Behavioral and Social Science Competencies in Medical Education. *Acad Med* 2016;**91**:730–42. doi:10.1097/ACM.0000000000001090
- 6 Deveugele M. Communication training: Skills and beyond. *Patient Educ Couns* 2015;**98**:1287–91. doi:10.1016/j.pec.2015.08.011
- 7 Sommer J, Lanier C, Perron NJ, *et al.* A teaching skills assessment tool inspired by the Calgary-Cambridge model and the patient-centered approach. *Patient Educ Couns* 2016;**99**:600–9. doi:10.1016/j.pec.2015.11.024
- 8 Mamede S, Schmidt HG. The structure of reflective practice in medicine. *Med Educ* 2004;**38**:1302–8. doi:10.1111/j.1365-2929.2004.01917.x
- 9 Nguyen QD, Fernandez N, Karsenti T, *et al.* What is reflection? A conceptual analysis of major definitions and a proposal of a five-component model. *Med Educ* 2014;**48**:1176–89. doi:10.1111/medu.12583
- 10 Schön DA. *The reflective practitioner: How professionals think in action.* 1985. doi:10.1109/PROC.1985.13210
- 11 Karnieli-Miller O. Reflective practice in the teaching of communication skills. *Patient*

- 1  
2  
3 *Educ Couns* Published Online First: July 2020. doi:10.1016/j.pec.2020.06.021  
4  
5  
6 12 Shapiro J, Kasman D, Shafer A. Words and Wards: A Model of Reflective Writing and  
7 Its Uses in Medical Education. *J Med Humanit* 2006;**27**:231–44. doi:10.1007/s10912-  
8 006-9020-y  
9  
10  
11 13 Walling A, Shapiro J, Ast T. What makes a good reflective paper? *Fam Med*  
12 2013;**45**:7–12.  
13  
14  
15 14 Chen I, Forbes C. Reflective writing and its impact on empathy in medical education:  
16 systematic review. *J Educ Eval Health Prof* 2014;**11**:20. doi:10.3352/jeehp.2014.11.20  
17  
18  
19 15 Embo MPC, Driessen E, Valcke M, *et al*. Scaffolding reflective learning in clinical  
20 practice: A comparison of two types of reflective activities. *Med Teach* 2014;**36**:602–  
21 7. doi:10.3109/0142159X.2014.899686  
22  
23  
24 16 Caeiro C, Cruz EB, Pereira CM. Arts, literature and reflective writing as educational  
25 strategies to promote narrative reasoning capabilities among physiotherapy students.  
26 *Physiother Theory Pract* 2014;**30**:572–80. doi:10.3109/09593985.2014.928919  
27  
28  
29 17 Muneeb A. The Art of Healing through Narrative Medicine in Clinical Practice: A  
30 Reflection. *Perm J* Published Online First: 2017. doi:10.7812/TPP/17-013  
31  
32  
33 18 Larsen DP, London DA, Emke AR. Using reflection to influence practice: student  
34 perceptions of daily reflection in clinical education. *Perspect Med Educ* 2016;**5**:285–  
35 91. doi:10.1007/s40037-016-0293-1  
36  
37  
38 19 Karnieli-Miller O, Palombo M, Meitar D. See, reflect, learn more: qualitative analysis  
39 of breaking bad news reflective narratives. *Med Educ* 2018;**52**:497–  
40 512. <http://doi.wiley.com/10.1111/medu.13582>  
41  
42  
43 20 Karnieli-Miller O, Michael K, Eidelman S, *et al*. What you “see” is how you  
44 communicate: Medical students’ meaning making of a patient’s vignette. *Patient Educ*  
45 *Couns* 2018;**101**:1645–53. doi:10.1016/j.pec.2018.04.004  
46  
47  
48 21 Braverman G, Bereksnyi Merrell S, Bruce JS, *et al*. Finding the Words: Medical  
49 Students’ Reflections on Communication Challenges in Clinic. *Fam Med*  
50 2016;**48**:775–83. [https://www.cochranelibrary.com/central/doi/10.1002/central/CN-](https://www.cochranelibrary.com/central/doi/10.1002/central/CN-01606071/full)  
51 [01606071/full](https://www.cochranelibrary.com/central/doi/10.1002/central/CN-01606071/full)  
52  
53  
54  
55  
56  
57  
58  
59  
60

- 1  
2  
3 22 Wald HS, Borkan JM, Taylor JS, *et al.* Fostering and Evaluating Reflective Capacity  
4 in Medical Education: Developing the REFLECT Rubric for Assessing Reflective  
5 Writing. *Acad Med* 2012;**87**:41–50. doi:10.1097/ACM.0b013e31823b55fa  
6  
7  
8  
9 23 Uygur J, Stuart E, De Paor M, *et al.* A Best Evidence in Medical Education systematic  
10 review to determine the most effective teaching methods that develop reflection in  
11 medical students: BEME Guide No. 51. *Med Teach* 2019;**41**:3–16.  
12 doi:10.1080/0142159X.2018.1505037  
13  
14  
15  
16 24 Nicolaides M, Cardillo L, Theodoulou I, *et al.* Developing a novel framework for non-  
17 technical skills learning strategies for undergraduates: A systematic review. *Ann Med*  
18 *Surg* 2018;**36**:29–40. doi:10.1016/j.amsu.2018.10.005  
19  
20  
21  
22 25 Laidlaw A, Salisbury H, Doherty EM, *et al.* National survey of clinical communication  
23 assessment in medical education in the United Kingdom (UK). *BMC Med Educ*  
24 2014;**14**:10. doi:10.1186/1472-6920-14-10  
25  
26  
27  
28 26 Martino S, Haeseler F, Belitsky R, *et al.* Teaching brief motivational interviewing to  
29 Year three medical students. *Med Educ* 2007;**41**:160–7. doi:10.1111/j.1365-  
30 2929.2006.02673.x  
31  
32  
33  
34 27 Locklear W, Meires J, Quallich SA. Letters to the Editor. *Urol Nurs* 2018;**38**:307.  
35 doi:10.7257/1053-816x.2018.38.6.307  
36  
37  
38 28 Ayuob NN, Qadi MA, Eldeek BS, *et al.* Evaluation of a communication skills training  
39 course for medical students using peer role-play. *J Pak Med Assoc* 2017;**67**:745–51.  
40  
41  
42  
43 29 Roze Des Ordons AL, Doig CJ, Couillard P, *et al.* From Communication Skills to  
44 Skillful Communication: A Longitudinal Integrated Curriculum for Critical Care  
45 Medicine Fellows. *Acad Med* 2017;**92**:501–5. doi:10.1097/ACM.0000000000001420  
46  
47  
48 30 Simmenroth-Nayda A, Heinemann S, Nolte C, *et al.* Psychometric properties of the  
49 Calgary Cambridge guides to assess communication skills of undergraduate medical  
50 students. *Int J Med Educ* 2014;**5**:212–8. doi:10.5116/ijme.5454.c665  
51  
52  
53  
54 31 Kurtz SM, Silverman JD. The Calgary-Cambridge Referenced Observation Guides: an  
55 aid to defining the curriculum and organizing the teaching in communication training  
56 programmes. *Med Educ* 1996;**30**:83–9. doi:10.1111/j.1365-2923.1996.tb00724.x  
57  
58  
59  
60 32 Stewart M, Brown JB, Weston WW, *et al.* *Patient-Centered Medicine: Transforming*



- 1  
2  
3 *the Clinical Method*. Third Edit. London: : Radcliffe Publishing 2014.  
4  
5  
6 33 Gibbs G. *Learning by doing: A guide to teaching and learning methods*. London,  
7 England, England: : FEU 1988.  
8  
9  
10 34 Franco C, Franco R, Severo M, *et al*. A Brief Course on Clinical Communication  
11 Skills: A Multi- Centered Study. *Acta Med Port* 2016;**29**:809–18.  
12 doi:10.20344/amp.8393  
13  
14  
15 35 Meeus W, Van Petegem P, Engels N. Validity and reliability of portfolio assessment in  
16 pre-service teacher education. *Assess Eval High Educ* 2009;**34**:401–13.  
17 doi:10.1080/02602930802062659  
18  
19  
20  
21 36 Makoul G. Essential elements of communication in medical encounters: the  
22 Kalamazoo consensus statement. *Acad Med* 2001;**76**:390–  
23 3.<http://www.ncbi.nlm.nih.gov/pubmed/11299158>  
24  
25  
26  
27 37 Franco CAG dos S, Franco RS, Santos VM dos, *et al*. OSCE para Competências de  
28 Comunicação Clínica e Profissionalismo: Relato de Experiência e Meta-Avaliação.  
29 *Rev Bras Educ Med* 2015;**39**:433–41. doi:10.1590/1981-52712015v39n3e02832014  
30  
31  
32  
33 38 Plack MM, Driscoll M, Marquez M, *et al*. Assessing Reflective Writing on a Pediatric  
34 Clerkship by Using a Modified Bloom’s Taxonomy. *Ambul Pediatr* 2007;**7**:285–91.  
35 doi:10.1016/j.ambp.2007.04.006  
36  
37  
38  
39 39 Barton G, Ryan M. Multimodal approaches to reflective teaching and assessment in  
40 higher education. *High Educ Res Dev* 2014;**33**:409–24.  
41 doi:10.1080/07294360.2013.841650  
42  
43  
44  
45 40 Hulsman RL. Shifting goals in medical communication. Determinants of goal  
46 detection and response formation. *Patient Educ Couns* 2009;**74**:302–8.  
47 doi:10.1016/j.pec.2008.12.001  
48  
49  
50  
51 41 Miller GE. The assessment of clinical skills/competence/performance. *Acad Med*  
52 1990;**65**:S63-7.<http://www.ncbi.nlm.nih.gov/pubmed/2400509>  
53  
54  
55 42 Pangaro L, ten Cate O. Frameworks for learner assessment in medicine: AMEE Guide  
56 No. 78. *Med Teach* 2013;**35**:e1197–210. doi:10.3109/0142159X.2013.788789  
57  
58  
59 43 Taylor DCMM, Hamdy H. Adult learning theories: implications for learning and  
60

- 1  
2  
3 teaching in medical education: AMEE Guide No. 83. *Med Teach* 2013;**35**:e1561-72.  
4 doi:10.3109/0142159X.2013.828153  
5  
6  
7  
8 44 Hayton A, Kang I, Wong R, *et al.* Teaching Medical Students to Reflect More Deeply.  
9 *Teach Learn Med* 2015;**27**:410–6. doi:10.1080/10401334.2015.1077124  
10  
11  
12 45 Wear D, Zarconi J, Garden R, *et al.* Reflection in/and Writing: Pedagogy and Practice  
13 in Medical Education. *Acad Med* 2012;**87**:603–9.  
14 doi:10.1097/ACM.0b013e31824d22e9  
15  
16  
17 46 Manca A, Gormley GJ, Johnston JL, *et al.* Honoring Medicine’s Social Contract. *Acad*  
18 *Med* 2019;:1. doi:10.1097/ACM.0000000000003059  
19  
20  
21 47 Mamede S, van Gog T, Moura AS, *et al.* Reflection as a strategy to foster medical  
22 students’ acquisition of diagnostic competence. *Med Educ* 2012;**46**:464–72.  
23 doi:10.1111/j.1365-2923.2012.04217.x  
24  
25  
26  
27 48 Finlay IG, Maughan TS, Webster DJ. Portfolio learning: a proposal for undergraduate  
28 cancer teaching. *Med Educ* 1994;**28**:79–82. doi:10.1111/j.1365-2923.1994.tb02690.x  
29  
30  
31 49 Cruess RL, Cruess SR, Steinert Y. Amending Miller’s Pyramid to Include Professional  
32 Identity Formation. *Acad Med* 2015;**91**:180–5. doi:10.1097/ACM.0000000000000913  
33  
34  
35 50 Al-Eraky M, Marei H. A fresh look at Miller’s pyramid: assessment at the ‘Is’ and  
36 ‘Do’ levels. *Med Educ* 2016;**50**:1253–7. doi:10.1111/medu.13101  
37  
38  
39 51 Lombarts MJMH. Competence-based education misses the essence of the medical  
40 profession. *Perspect Med Educ* 2015;**4**:326–8. doi:10.1007/s40037-015-0233-5  
41  
42  
43 52 McLeod GA, Barr J, Welch A. Best Practice for Teaching and Learning Strategies to  
44 Facilitate Student Reflection in Pre-Registration Health Professional Education: An  
45 Integrative Review. *Creat Educ* 2015;**06**:440–54. doi:10.4236/ce.2015.64044  
46  
47  
48 53 Murdoch-Eaton D, Sandars J. Reflection: moving from a mandatory ritual to  
49 meaningful professional development. *Arch Dis Child* 2014;**99**:279–83.  
50 doi:10.1136/archdischild-2013-303948  
51  
52  
53 54 Mann K, Gordon J, MacLeod A. Reflection and reflective practice in health  
54 professions education: a systematic review. *Adv Heal Sci Educ* 2009;**14**:595–621.  
55  
56  
57 55 Harrison C, Wass V. The challenge of changing to an assessment for learning culture.  
58  
59  
60

- 1  
2  
3 *Med Educ* 2016;**50**:704–6. doi:10.1111/medu.13058  
4  
5  
6 56 Ng SL, Kinsella EA, Friesen F, *et al.* Reclaiming a theoretical orientation to reflection  
7 in medical education research: a critical narrative review. *Med Educ* 2015;**49**:461–75.  
8 doi:10.1111/medu.12680  
9  
10  
11 57 Baernstein A, Fryer-Edwards K. Promoting reflection on professionalism: a  
12 comparison trial of educational interventions for medical students. *Acad Med*  
13 2003;**78**:742–  
14  
15 7.[http://ovidsp.ovid.com/ovidweb.cgi?T=JS&PAGE=reference&D=emed6&NEWS=N](http://ovidsp.ovid.com/ovidweb.cgi?T=JS&PAGE=reference&D=emed6&NEWS=N&AN=2003298275)  
16 &AN=2003298275  
17  
18  
19  
20 58 Sandars J, Homer M. Reflective learning and the Net Generation. *Med Teach*  
21 2008;**30**:877–9. doi:10.1080/01421590802263490  
22  
23  
24 59 Tsingos-Lucas C, Bosnic-Anticevich S, Schneider CR, *et al.* Using Reflective Writing  
25 as a Predictor of Academic Success in Different Assessment Formats. *Am J Pharm*  
26 *Educ* 2017;**81**:8. doi:10.5688/ajpe8118  
27  
28  
29  
30  
31  
32  
33  
34  
35  
36  
37  
38  
39  
40  
41  
42  
43  
44  
45  
46  
47  
48  
49  
50  
51  
52  
53  
54  
55  
56  
57  
58  
59  
60

Table 1. Example of fragments according to thematic categories.

| Thematic Categories          | Fragment Example                                                                                                                                        |
|------------------------------|---------------------------------------------------------------------------------------------------------------------------------------------------------|
| Non-Verbal                   | 'I quickly noticed a strange, slightly frightened look on his face...'                                                                                  |
| Steps of Consultation:       | '...the consultation I performed was... like a questionnaire application...'                                                                            |
| Doctor-Patient Relationship: | '...it helps me, mainly to understand how to put the patient's needs and well-being above my own...'                                                    |
| Empathy and Respect:         | 'I believe it is consensual that the attitude of the... is subject to criticism, after all, respect and patience with the patient are prerequisites...' |
| Humanistic Values:           | '...the way he introduced himself... the attention with which he listened...'                                                                           |

Table 2. Pearson correlations between the different methods of assessment.

| Assessment Methods    | OSCE            | CI 95%        | p-Value       | MCQ              | CI 95%        | p-Value       | REFLECT Score   | CI 95%       | p-Value       |
|-----------------------|-----------------|---------------|---------------|------------------|---------------|---------------|-----------------|--------------|---------------|
| <b>MCQ</b>            | 0.396<br>(n=69) | 0.17 to 0.59  | <b>0.001*</b> | -                |               | -             | -               |              | -             |
| <b>REFLECT Score</b>  | 0.250<br>(n=32) | -0.11 to 0.55 | <b>0.168</b>  | -0.219<br>(n=32) | -0.53 to 0.14 | <b>0.228</b>  | -               |              | -             |
| <b>Thematic Score</b> | 0.412<br>(n=32) | 0.07 to 0.66  | <b>0.019*</b> | 0.439<br>(n=32)  | 0.11 to 0.68  | <b>0.012*</b> | 0.410<br>(n=32) | 0.07 to 0.66 | <b>0.020*</b> |

\*the p-value was considered a sign of statistical significance when it was lower than 0.05. CI: Confidence Interval for Pearson's correlation.

Appendix 1 - Scoring Reflective Writing using REFLECT rubric:

**Reflective Writing:** *I felt uncomfortable and it was hard for me stay present in the consultation because of the way the professor informed the diagnosis and managed the patient. Assessing the situation according to what physicians must do, several skills were not fulfilled in the patient care process: attention to patient well-being, autonomy and responsibility to promote better health for patients. The gathering of history by students had no benefit to the patient and only served a didactic function. As the diagnosis is cancer, which is stigmatised and has a very high negative charge (senior physician had performed a prior consultation and obtained all necessary information), it might not be the best time for medical students "to practice" history-taking. After our history-taking, the senior physician discussed the therapy for cancer with students and asked another physician to participate. They discussed the prognosis for the patient, suggested a new protocol in the research phase and assumed results that should not happen. All of these events occurred in front of the patient and their family. Adequate communication is important to adapt communication to each patient. Information must be provided according to subjects' needs and their capacity to understand... "Why to discuss in that way? They discussed uncertain things and affirmed the prognosis and other indications without scientific confirmation. It is difficult to evaluate these complex issues as students due to the scarce theoretical foundation for communication in medical school. The process of assimilation and application of role models prevails if there is no other point of criticism...*

**1- Writing Spectrum – Level: Reflection** (“movement beyond reporting or descriptive writing to reflecting; i.e., attempting to understand, question, or analyse an event”<sup>1</sup>). The fragments disposed of reveal that students wrote beyond the descriptive level. However, they did not explore and criticise the values, beliefs or assumptions behind the observed behaviour. Thus, this reflection exceeds the descriptive level and achieves reflection but not a critical reflection – the higher level for writing spectrum: *“The gathering of history by students had no benefit for the patient, but only a didactic function.”; “As the diagnosis is cancer, which is stigmatised and has a very high negative charge (senior physician had conducted a prior consultation and obtained all necessary information), it might not be the best time for medical students "to practice" history-taking.”*

**2- Presence – Level: Reflection** (“sense of writer being largely present”<sup>1</sup>) – The students presented the situation including her/himself in the situation, described the situation according to her/his point of view, which enabled an understanding of the participation of the student in the consultation. However, more details are needed to bring the reader to the setting, as expected for the Critical Reflection Level.

**3- Description of conflict or disorienting dilemma – Level: Reflection** (“description of the disorienting dilemma, conflict, challenge, or issue of concern”<sup>1</sup>) – The description includes the disorienting dilemma but does not include a more profound understanding of the “conflict, challenge, or issue of concern that includes multiple perspectives...” as expected for the next level: “Critical Reflection”. There are three main dilemmas: the need to adapt the communication to each patient, the negative role models and the responsibility to patient well-being. All these elements were clearly stated in the text but lacked the necessary detail for Critical Reflection.

**4- Attending to Emotions – Level: Thoughtful action** (“recognition but no exploration or attention to emotions”<sup>1</sup>) – The students described his/her feeling and the narrative transmits his/her difficulty in handling emotions during the situation. However, no exploration was required for the next level of writing (Reflection) and beyond the recognition and insight on emotions necessary in Critical Reflection.

**5- Analysis and Meaning Making – Level: Reflection** (“some analysis and meaning-making”<sup>1</sup>) - The student noticed problems regarding communication and physicians' attitude. The writing suggests that the students recognised and analysed the situation; however, it could be more comprehensive for achieving Critical Reflection – for example, why did this doctor behave in this manner? The following fragments present some analysis of the student: *“it might not be the best time for medical students "to practice" history-taking...”;* *“To communicate adequately is important to adapt communication to each patient, and the information must be provided according to subjects' needs and the capacity to understand...”.*

1- REFLECT rubric statements from: Wald, H. S., Borkan, J. M., Taylor, J. S., Anthony, D., & Reis, S. P. (2012). Fostering and Evaluating Reflective Capacity in Medical Education: Developing the REFLECT Rubric for Assessing Reflective Writing. *Academic Medicine*, 87(1), 41–50. The text in *italic* correspond to the student reflective writing. The text in **bold** correspond to the REFLECT rubric items.

# Reporting checklist for cohort study.

Based on the STROBE cohort guidelines.

## Instructions to authors

Complete this checklist by entering the page numbers from your manuscript where readers will find each of the items listed below.

Your article may not currently address all the items on the checklist. Please modify your text to include the missing information. If you are certain that an item does not apply, please write "n/a" and provide a short explanation.

Upload your completed checklist as an extra file when you submit to a journal.

In your methods section, say that you used the STROBE cohort reporting guidelines, and cite them as:

von Elm E, Altman DG, Egger M, Pocock SJ, Gøtzsche PC, Vandenbroucke JP. The Strengthening of Reporting of Observational Studies in Epidemiology (STROBE) Statement: guidelines for reporting observational studies.

|                           | Reporting Item                                                                                                                                     | Page Number |
|---------------------------|----------------------------------------------------------------------------------------------------------------------------------------------------|-------------|
| <b>Title and abstract</b> |                                                                                                                                                    |             |
| Title                     | <a href="#">#1a</a> Indicate the study's design with a commonly used term in the title or the abstract                                             | 1           |
| Abstract                  | <a href="#">#1b</a> Provide in the abstract an informative and balanced summary of what was done and what was found                                | 4           |
| <b>Introduction</b>       |                                                                                                                                                    |             |
| Background / rationale    | <a href="#">#2</a> Explain the scientific background and rationale for the investigation being reported                                            | 5           |
| Objectives                | <a href="#">#3</a> State specific objectives, including any prespecified hypotheses                                                                | 7           |
| <b>Methods</b>            |                                                                                                                                                    |             |
| Study design              | <a href="#">#4</a> Present key elements of study design early in the paper                                                                         | 9           |
| Setting                   | <a href="#">#5</a> Describe the setting, locations, and relevant dates, including periods of recruitment, exposure, follow-up, and data collection | 9           |

|    |                            |                      |                                                                                                                                                                                                                                                                      |                          |
|----|----------------------------|----------------------|----------------------------------------------------------------------------------------------------------------------------------------------------------------------------------------------------------------------------------------------------------------------|--------------------------|
| 1  | Eligibility criteria       | <a href="#">#6a</a>  | Give the eligibility criteria, and the sources and methods of selection of participants. Describe methods of follow-up.                                                                                                                                              | 10                       |
| 2  |                            |                      |                                                                                                                                                                                                                                                                      |                          |
| 3  |                            |                      |                                                                                                                                                                                                                                                                      |                          |
| 4  | Eligibility criteria       | <a href="#">#6b</a>  | For matched studies, give matching criteria and number of exposed and unexposed                                                                                                                                                                                      | 10                       |
| 5  |                            |                      |                                                                                                                                                                                                                                                                      |                          |
| 6  |                            |                      |                                                                                                                                                                                                                                                                      |                          |
| 7  |                            |                      |                                                                                                                                                                                                                                                                      |                          |
| 8  | Variables                  | <a href="#">#7</a>   | Clearly define all outcomes, exposures, predictors, potential confounders, and effect modifiers. Give diagnostic criteria, if applicable                                                                                                                             | 10-11                    |
| 9  |                            |                      |                                                                                                                                                                                                                                                                      |                          |
| 10 |                            |                      |                                                                                                                                                                                                                                                                      |                          |
| 11 |                            |                      |                                                                                                                                                                                                                                                                      |                          |
| 12 |                            |                      |                                                                                                                                                                                                                                                                      |                          |
| 13 |                            |                      |                                                                                                                                                                                                                                                                      |                          |
| 14 | Data sources / measurement | <a href="#">#8</a>   | For each variable of interest give sources of data and details of methods of assessment (measurement). Describe comparability of assessment methods if there is more than one group. Give information separately for for exposed and unexposed groups if applicable. | 10-11                    |
| 15 |                            |                      |                                                                                                                                                                                                                                                                      |                          |
| 16 |                            |                      |                                                                                                                                                                                                                                                                      |                          |
| 17 |                            |                      |                                                                                                                                                                                                                                                                      |                          |
| 18 |                            |                      |                                                                                                                                                                                                                                                                      |                          |
| 19 |                            |                      |                                                                                                                                                                                                                                                                      |                          |
| 20 |                            |                      |                                                                                                                                                                                                                                                                      |                          |
| 21 |                            |                      |                                                                                                                                                                                                                                                                      |                          |
| 22 | Bias                       | <a href="#">#9</a>   | Describe any efforts to address potential sources of bias                                                                                                                                                                                                            | 13                       |
| 23 |                            |                      |                                                                                                                                                                                                                                                                      |                          |
| 24 | Study size                 | <a href="#">#10</a>  | Explain how the study size was arrived at                                                                                                                                                                                                                            | n/a - convenience sample |
| 25 |                            |                      |                                                                                                                                                                                                                                                                      |                          |
| 26 |                            |                      |                                                                                                                                                                                                                                                                      |                          |
| 27 |                            |                      |                                                                                                                                                                                                                                                                      |                          |
| 28 |                            |                      |                                                                                                                                                                                                                                                                      |                          |
| 29 |                            |                      |                                                                                                                                                                                                                                                                      |                          |
| 30 | Quantitative variables     | <a href="#">#11</a>  | Explain how quantitative variables were handled in the analyses. If applicable, describe which groupings were chosen, and why                                                                                                                                        | 9-13                     |
| 31 |                            |                      |                                                                                                                                                                                                                                                                      |                          |
| 32 |                            |                      |                                                                                                                                                                                                                                                                      |                          |
| 33 |                            |                      |                                                                                                                                                                                                                                                                      |                          |
| 34 | Statistical methods        | <a href="#">#12a</a> | Describe all statistical methods, including those used to control for confounding                                                                                                                                                                                    | 9-13                     |
| 35 |                            |                      |                                                                                                                                                                                                                                                                      |                          |
| 36 |                            |                      |                                                                                                                                                                                                                                                                      |                          |
| 37 | Statistical methods        | <a href="#">#12b</a> | Describe any methods used to examine subgroups and interactions                                                                                                                                                                                                      | 9-13                     |
| 38 |                            |                      |                                                                                                                                                                                                                                                                      |                          |
| 39 |                            |                      |                                                                                                                                                                                                                                                                      |                          |
| 40 |                            |                      |                                                                                                                                                                                                                                                                      |                          |
| 41 | Statistical methods        | <a href="#">#12c</a> | Explain how missing data were addressed                                                                                                                                                                                                                              | 9-13                     |
| 42 |                            |                      |                                                                                                                                                                                                                                                                      |                          |
| 43 |                            |                      |                                                                                                                                                                                                                                                                      |                          |
| 44 |                            |                      |                                                                                                                                                                                                                                                                      |                          |
| 45 | Statistical methods        | <a href="#">#12d</a> | If applicable, explain how loss to follow-up was addressed                                                                                                                                                                                                           | n/a                      |
| 46 |                            |                      |                                                                                                                                                                                                                                                                      |                          |
| 47 |                            |                      |                                                                                                                                                                                                                                                                      |                          |
| 48 |                            |                      |                                                                                                                                                                                                                                                                      |                          |
| 49 | Statistical methods        | <a href="#">#12e</a> | Describe any sensitivity analyses                                                                                                                                                                                                                                    | 9-13                     |
| 50 |                            |                      |                                                                                                                                                                                                                                                                      |                          |
| 51 |                            |                      |                                                                                                                                                                                                                                                                      |                          |
| 52 |                            |                      |                                                                                                                                                                                                                                                                      |                          |
| 53 | <b>Results</b>             |                      |                                                                                                                                                                                                                                                                      |                          |
| 54 |                            |                      |                                                                                                                                                                                                                                                                      |                          |
| 55 | Participants               | <a href="#">#13a</a> | Report numbers of individuals at each stage of study—eg numbers potentially eligible, examined for eligibility, confirmed eligible, included in the study, completing follow-up, and                                                                                 | 14                       |
| 56 |                            |                      |                                                                                                                                                                                                                                                                      |                          |
| 57 |                            |                      |                                                                                                                                                                                                                                                                      |                          |
| 58 |                            |                      |                                                                                                                                                                                                                                                                      |                          |
| 59 |                            |                      |                                                                                                                                                                                                                                                                      |                          |
| 60 |                            |                      |                                                                                                                                                                                                                                                                      |                          |



analysed. Give information separately for for exposed and unexposed groups if applicable.

|    |                   |                      |                                                                         |
|----|-------------------|----------------------|-------------------------------------------------------------------------|
| 1  |                   |                      |                                                                         |
| 2  |                   |                      |                                                                         |
| 3  |                   |                      |                                                                         |
| 4  | Participants      | <a href="#">#13b</a> | Give reasons for non-participation at each stage 14                     |
| 5  |                   |                      |                                                                         |
| 6  | Participants      | <a href="#">#13c</a> | Consider use of a flow diagram n/a -                                    |
| 7  |                   |                      | convenience                                                             |
| 8  |                   |                      | sample                                                                  |
| 9  |                   |                      |                                                                         |
| 10 |                   |                      |                                                                         |
| 11 | Descriptive data  | <a href="#">#14a</a> | Give characteristics of study participants (eg demographic, 14          |
| 12 |                   |                      | clinical, social) and information on exposures and potential            |
| 13 |                   |                      | confounders. Give information separately for exposed and                |
| 14 |                   |                      | unexposed groups if applicable.                                         |
| 15 |                   |                      |                                                                         |
| 16 |                   |                      |                                                                         |
| 17 |                   |                      |                                                                         |
| 18 | Descriptive data  | <a href="#">#14b</a> | Indicate number of participants with missing data for each 14           |
| 19 |                   |                      | variable of interest                                                    |
| 20 |                   |                      |                                                                         |
| 21 |                   |                      |                                                                         |
| 22 | Descriptive data  | <a href="#">#14c</a> | Summarise follow-up time (eg, average and total amount) 14              |
| 23 |                   |                      |                                                                         |
| 24 | Outcome data      | <a href="#">#15</a>  | Report numbers of outcome events or summary measures over 14-15         |
| 25 |                   |                      | time. Give information separately for exposed and unexposed             |
| 26 |                   |                      | groups if applicable.                                                   |
| 27 |                   |                      |                                                                         |
| 28 |                   |                      |                                                                         |
| 29 |                   |                      |                                                                         |
| 30 | Main results      | <a href="#">#16a</a> | Give unadjusted estimates and, if applicable, confounder- 14-15         |
| 31 |                   |                      | adjusted estimates and their precision (eg, 95% confidence              |
| 32 |                   |                      | interval). Make clear which confounders were adjusted for and           |
| 33 |                   |                      | why they were included                                                  |
| 34 |                   |                      |                                                                         |
| 35 |                   |                      |                                                                         |
| 36 | Main results      | <a href="#">#16b</a> | Report category boundaries when continuous variables were 14-15         |
| 37 |                   |                      | categorized                                                             |
| 38 |                   |                      |                                                                         |
| 39 |                   |                      |                                                                         |
| 40 | Main results      | <a href="#">#16c</a> | If relevant, consider translating estimates of relative risk into 11-12 |
| 41 |                   |                      | absolute risk for a meaningful time period                              |
| 42 |                   |                      |                                                                         |
| 43 |                   |                      |                                                                         |
| 44 | Other analyses    | <a href="#">#17</a>  | Report other analyses done—e.g., analyses of subgroups and 14-15        |
| 45 |                   |                      | interactions, and sensitivity analyses                                  |
| 46 |                   |                      |                                                                         |
| 47 |                   |                      |                                                                         |
| 48 | <b>Discussion</b> |                      |                                                                         |
| 49 |                   |                      |                                                                         |
| 50 | Key results       | <a href="#">#18</a>  | Summarise key results with reference to study objectives 15             |
| 51 |                   |                      |                                                                         |
| 52 |                   |                      |                                                                         |
| 53 | Limitations       | <a href="#">#19</a>  | Discuss limitations of the study, taking into account sources of 17-18  |
| 54 |                   |                      | potential bias or imprecision. Discuss both direction and               |
| 55 |                   |                      | magnitude of any potential bias.                                        |
| 56 |                   |                      |                                                                         |
| 57 |                   |                      |                                                                         |
| 58 |                   |                      |                                                                         |
| 59 |                   |                      |                                                                         |
| 60 |                   |                      |                                                                         |

|    |                    |                     |                                                                                                                                                                  |       |
|----|--------------------|---------------------|------------------------------------------------------------------------------------------------------------------------------------------------------------------|-------|
| 1  | Interpretation     | <a href="#">#20</a> | Give a cautious overall interpretation considering objectives, limitations, multiplicity of analyses, results from similar studies, and other relevant evidence. | 15-17 |
| 2  |                    |                     |                                                                                                                                                                  |       |
| 3  |                    |                     |                                                                                                                                                                  |       |
| 4  |                    |                     |                                                                                                                                                                  |       |
| 5  |                    |                     |                                                                                                                                                                  |       |
| 6  | Generalisability   | <a href="#">#21</a> | Discuss the generalisability (external validity) of the study results                                                                                            | 17-18 |
| 7  |                    |                     |                                                                                                                                                                  |       |
| 8  |                    |                     |                                                                                                                                                                  |       |
| 9  |                    |                     |                                                                                                                                                                  |       |
| 10 | <b>Other</b>       |                     |                                                                                                                                                                  |       |
| 11 | <b>Information</b> |                     |                                                                                                                                                                  |       |
| 12 |                    |                     |                                                                                                                                                                  |       |
| 13 |                    |                     |                                                                                                                                                                  |       |
| 14 | Funding            | <a href="#">#22</a> | Give the source of funding and the role of the funders for the present study and, if applicable, for the original study on which the present article is based    | 20    |
| 15 |                    |                     |                                                                                                                                                                  |       |
| 16 |                    |                     |                                                                                                                                                                  |       |
| 17 |                    |                     |                                                                                                                                                                  |       |
| 18 |                    |                     |                                                                                                                                                                  |       |

## Notes:

- 10: n/a - convenience sample
- 13c: n/a - convenience sample The STROBE checklist is distributed under the terms of the Creative Commons Attribution License CC-BY. This checklist was completed on 27. March 2020 using <https://www.goodreports.org/>, a tool made by the [EQUATOR Network](#) in collaboration with [Penelope.ai](#)
